# Supplementary material
Source: PubMed Central journal article supplement (PMC4337786)
Supplement: NIHMS664144-supplement-Supp_Materials.pdf [file NIHMS664144-supplement-Supp_Materials.pdf]

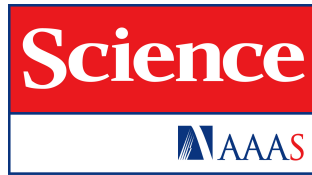

## Supplementary Materials for

### Mouse regulatory DNA landscapes reveal global principles of *cis*-regulatory evolution

Jeff Vierstra, Eric Rynes, Richard Sandstrom, Miaohua Zhang, Theresa Canfield, R. Scott Hansen, Sandra Stehling-Sun, Peter J. Sabo, Rachel Byron, Richard Humbert, Robert E. Thurman, Audra K. Johnson, Shinny Vong, Kristen Lee, Daniel Bates, Fidencio Neri, Morgan Diegel, Erika Giste, Eric Haugen, Douglas Dunn, Matthew S. Wilken, Steven Josefowicz, Robert Samstein, Kai-Hsin Chang, Evan E. Eichler, Marella De Bruijn, Thomas A. Reh, Arthur Skoultchi, Alexander Rudensky, Stuart H. Orkin, Thalia Papayannopoulou, Piper M. Treuting, Licia Selleri, Rajinder Kaul, Mark Groudine, M. A. Bender, and John A. Stamatoyannopoulos

Correspondence to: [jstam@uw.edu](mailto:jstam@uw.edu)

#### **This PDF file includes:**

Materials and Methods  
Figures S1 to S19  
Tables S1 to S4  
References and Notes (27–52)

## **Materials and Methods**

### **Mouse strains**

The mouse cell lines and tissues used in this study are outlined in **table S1**.

### **Nuclei isolation from solid mouse tissues**

Solid mouse tissues were minced in 2 mm square pieces and resuspended in 3 mL of homogenization buffer (20 mM tricine, 25 mM D-sucrose, 15 mM NaCl, 60 mM KCl, 2 mM MgCl<sub>2</sub>, 0.5 mM spermidine, pH 7.8) per gram of tissue. The nuclei were released by 5-10 strokes in a Dounce homogenizer with a loose-fitting type-A pestle and the resulting homogenate was filtered through a 100µm filter. For some samples, the homogenate was cryopreserved before DNaseI treatment (10% DMSO was added for a controlled freeze to -80°C; stored in liquid nitrogen). Prior to DNase I treatment an additional buffer exchange was performed (for both fresh and frozen samples) by first adding 15 mL of sucrose buffer (10 mM Tris-HCl, 250 mM D-sucrose, 1 mM MgCl<sub>2</sub>, pH 7.5), collecting nuclei by centrifugation (600g for 10 minutes at 4°C), and then resuspending nuclei pellet in 10 mL of fresh sucrose buffer. The nuclei were filtered through a 20µm filter and collected by centrifugation (600g for 10 minutes at 4°C). The nuclei pellet was washed once in 10 mL of buffer A (15 mM Tris-HCl, 15 mM NaCl, 60 mM KCl, 1 mM EDTA, 0.5 mM EGTA, 0.5 mM spermidine) and resuspended at concentration of 2 x 10<sup>6</sup> per mL.

### **Nuclei isolation of mouse cultured and primary cells**

Cells (primary or cultured) were washed once with Dulbecco's PBS (without MgCl<sub>2</sub> or CaCl<sub>2</sub>). Nuclei were extracted by resuspending cells in buffer A supplemented with detergent (IGEPAL-CA630) (Sigma) and incubating for 10 minutes on ice. Following incubation, the nuclei were collected by centrifugation (600g) and resuspended in buffer A at a concentration of 2 x 10<sup>6</sup> nuclei per mL. Optimal detergent concentrations for nuclei extraction were empirically derived for each cell type (commonly ranging from 0.010–0.10%).

### **DNase I digestion of mouse nuclei**

Fresh nuclei were incubated for 3 minutes at 37°C with limiting concentrations of the DNA endonuclease deoxyribonuclease I (DNase I) (Sigma) in buffer A supplemented with Ca<sup>2+</sup>. The digestion was stopped with stop buffer (50 mM Tris-HCl, 100 mM NaCl, 0.1% SDS, 100 mM EDTA, 1 mM spermidine, 0.5 spermine, pH 8.0) and the samples were treated with proteinase K and RNase A. The small 'double-hit' fragments (<750 bp) were recovered by sucrose ultracentrifugation, end-

repaired and ligated with adapters compatible with the Illumina sequencing platform. A detailed protocol describing genome-wide mapping of DNase I hypersensitivity can be found in (27).

### **DNase I fragment sequence alignment and normalization**

Mouse (NCBI37) and human (GRCh37) 36 bp sequence reads were mapped using bowtie (28), version 0.12.7 with parameters: “`--mm -v 3 -k 2`”, with “`-phred33-quals`” for Illumina HiSeq sequencer runs or “`--phred64-quals`” for Illumina GAI sequencer runs. Only uniquely mapping reads with up to 2 mismatches were retained; this was accomplished by additionally filtering the “`-k 2`” results, when present, for actual uniqueness within the potential 2-3 mismatch alignments (any remaining 3-mismatch-only alignments were discarded). Signal tracks were generated using BEDOPS (29), summing reads within a window size of  $\pm 75$ bp in 20 bp steps and subsequently normalizing to the total number of reads per dataset and then scaling to one million reads. The NCBI and Mouse Genome Sequencing Consortium build 37 (MGSCv37/mm9) including chromosome Y was used as the reference assembly for all sequence alignments.

### **DHS identification and master list creation**

We identified DNase I hypersensitive regions of chromatin accessibility (hotspots) and more highly accessible DNaseI hypersensitive sites (DHSs, or peaks) within the hotspots, using the hotspot algorithm (30). Briefly, the hotspot algorithm is a scan statistic that uses the binomial distribution to gauge enrichment of tags based on a local background model estimated around every tag. General-sized regions of enrichment are identified as hotspots, and then 150 bp peaks within hotspots are called by looking for local maxima in the tag density profile (sliding window tag count in 150 bp windows, stepping every 20 bp). Further stringencies are applied to the local maximum detections to prevent overcalling of spurious peaks. Hotspot also includes a FDR (false discovery rate) estimation procedure for thresholding hotspots and peaks, based on a simulation approach. Random reads are generated at the same sequencing depth as the target sample, hotspots are called on the simulated data, and the random and observed hotspots are compared via their Z-scores (based on the binomial model) to estimate the FDR.

The DHSs called on individual cell-types were consolidated into a master list of unique, non-overlapping DHS positions by first merging the FDR 1% peaks across all cell-types. Then, for each resulting interval of merged sites, the DHS with the highest Z-score was selected for the master list. Any DHSs overlapping the peaks selected for the master list were then discarded. The remaining DHSs were then merged and the process repeated until each original DHS was either in the master

list or discarded.

Due to the variability in sequencing depth within the mouse DNase I experiments, we down-sampled each mouse dataset to 25 million sequencing tags (random sampling without replacement) and used the sampled tags to detect hotspots and DHSs.

### **Data availability**

All mouse sequence data generated for this study can be accessed with GEO accession numbers found within **table S1**. Processed data such as hotspots and peaks are released as part of the Mouse ENCODE Consortium and available for download at the data portal website (<http://www.mouse-encode.org>).

### **Human DNase I data**

Human DNase I data was generated as part of the ENCODE Project (31) or the Roadmap Epigenomics Mapping Consortium (10). Raw sequence tag data can be accessed through the GEO accession numbers in **table S2**. Processed data such as hotspots and DHS peaks can be accessed at <http://www.encode-roadmap.org/>.

### **Genomic annotations**

Genome annotations used for all analysis correspond to the GENCODE version 10 (32) (human) or ENSEMBL 65 (33) (mouse). Promoters are defined as 1 kb upstream of a TSS.

### **Alignment of DHSs between mouse and human**

Pair-wise genome alignments (“over” chain files) between mouse (mm9) and human (hg19) were downloaded from the UCSC Genome Browser (34). Using these chain files, DHSs were mapped between species using the software “bnMapper” (bx-python software package; available at [http://bitbucket.org/james\\_taylor/bx-python](http://bitbucket.org/james_taylor/bx-python)) using the following parameters: “-fBED12 --gap 20 --threshold 0.1”. The mapped blocks were then intersected with a DHS peak list from the query species using the software BEDOPS (29), requiring only 1 base-pair of overlap. We applied this mapping strategy for each target-query pair (i.e., human → mouse and mouse → human) and then retained DHSs in each list that were in strict reciprocal relationships.

### **Alignment of mouse DHS sequence to the vertebrate phylogeny**

Pairwise genome alignments (“over” chain files) were downloaded from the UCSC Genome Browser

between mouse (mm9) or human (hg19) to the following genomes: panda (ailMel1), lizard (anoCar2), cow (bosTau7), lancelet (braFlo1), marmoset (calJac3), dog (canFam2), guinea pig (cavPor3), zebrafish (danRer7), tenrec (echTel1), horse (equCab2), cat (felCat4), fugu (fr2), chicken (galGal3), stickleback (gasAcu1), human (hg19), elephant (loxAfr3), turkey (melGal1), opossum (monDom5), platypus (ornAna1), rabbit (oryCun2), medaka (oryLat2), sheep (oviAri1), chimp (panTro3), lamprey (petMar1), orangutan (ponAbe2), macaque (rheMac2), rat (rn5), pig (susScr2), tetradon (tetNig2), and frog (xenTro3). Using the sequence alignment strategy described above (see *Cross-alignment of DHSs between mouse and human*), each mouse DHS was to each of these genomes.

To estimate the proportion of regulatory elements conserved throughout vertebrate evolution, we overlaid the sequence alignments on a recent proposed vertebrate phylogenies obtained from (35-37). We considered a DHS to be conserved if it aligned successfully to one or more species within a branch of the phylogeny that share a MRCA with mouse.

### **Evolutionary sequence constraint**

The phastCons (38) element track corresponding to a 46-way multiple alignment of vertebrate species was downloaded from the UCSC Genome Browser (34). To assess conservation, we computed the fraction of phastCons elements that overlapped mouse DHSs grouped by conservation status with human.

### **Nucleotide diversity**

Human nucleotide diversity measurements ( $\pi$ ) were calculated using whole genome sequences from 53 unrelated, publicly available human genomes released by Complete Genomics (39) (version 1.1034) as previously described (8, 40).  $\pi$  for a heterozygous site is  $2pq$ , where  $p$  is the major allele frequency and  $q$  the minor allele frequency.  $\pi$  was calculated for each human tissue by summing  $2pq$  all variants and dividing by the total number of nucleotides considered. Repetitive elements identified by RepeatMasker (41, 42) (see *Analysis of repeat content within DHS*) were removed from all  $\pi$  calculations.

### **Functional variation within human DHSs**

A catalog of single nucleotide polymorphisms (SNPs) identified by genome-wide association studies was downloaded from NHGRI GWAS Catalog on December 3, 2013 from: <http://www.genome.gov/admin/gwascatalog.txt>. SNPs within coding regions were removed

yielding a total of 6,571 total loci. We randomly sampled the same number of SNPs from the 1000 Genomes Project (43) matched by distance to TSS, intergenic or intronic, and allele frequency as in (44). We repeated this sampling process 1,000 times to estimate the parameters of a normal distribution ( $\mu$ ,  $\sigma$ ). These parameters were used to calculate the upper-tail  $p$ -value of the observed overlap of GWAS SNPs.

### **Analysis of repeat content within DHSs**

We scanned both hg19 and mm9 for repeats using the RepeatMasker program (41) (<http://repeatmasker.org>) using the default parameters except for the specification of the species (e.g., human or mouse). The RepeatMasker database version 2012-04-18 was obtained from RepBase (42).

### **Tissue-selective mouse DHSs conserved in human**

We calculated the maximum density (tags per 150 bp, tiled at 20 bp genome-wide and normalized for sequencing depth) of DNase I cleavage within each DHS master peak across all 45 mouse tissues/experiments. To limit the effects of outliers, we normalized each value to 90% of the maximum (across all experiments) at each DHS peak. We then performed  $k$ -means clustering on a matrix with the columns comprising mouse DNase I experiments and the rows corresponding to individual DHSs contained within the master DHS peak list. The clustering was performed using an efficient implementation of the  $k$ -means++ algorithm (45) (GraphLab API, <http://graphlab.org/toolkits/clustering/>) setting  $k = 45$ .

### **TF recognition sequence predictions**

Transcription factor binding sites identified by scanning the entire genome for consensus sequences using the FIMO (46) tool from the MEME Suite (47) (version 4.6). A 5th order Markov model was generated from 36 bp mappable genome sequence and used as the background model. Motif models were curated from TRANSFAC (48) (version 11), JASPAR (49), and a SELEX-derived set from (50). Putative binding sites with a FIMO  $P < 10^{-4}$  were retained.

### **Grouping TF recognition sequence models by similarity**

Motif models used for the genome-wide scans were compared pairwise using the software TOMTOM (51) tool from the MEME Suite (47) (version 4.6) with the following parameters: “-dist kullback -query-pseudo 0.1 -target-pseudo 0.1 -text -min-overlap 0 -thresh 1”.

The same 5th order Markov model background model as the FIMO genome-wide scans was used. The resulting pairwise comparisons were hierarchically clustered using Pearson correlation as the distance metric and complete linkage. Clusters were selected by cutting the tree at a height of 0.1.

### **TF recognition sequence enrichment within tissue-selective DHSs**

We computed the number of DHSs containing an instance of each motif model. Using the cumulative hypergeometric distribution, a  $p$ -value for the number of observed DHSs containing a TF recognition sequence within a particular cluster of DHSs with respect to the overall prevalence of the recognition sequence within all mouse DHSs conserved in human. The  $p$ -values were thresholded using the Bonferroni correction method.

### **Gene ontology analysis of tissue-selective DHSs**

DHSs within lineage-specific clusters were supplied as input to GREAT (52). The analysis was run in the “basal plus extension” configuration, such that proximal regions were defined as 5 kb upstream and 1 kb downstream and distal regions were limited to 1 Mb.

### **Analysis of conserved DHS landscape usage mouse and human tissues**

To compare the usage of the conserved DHS landscape in between two tissues we computed the Jaccard index. The Jaccard index is defined as  $\frac{A \cap B}{A \cup B}$ , where A and B are the number DHSs active in a mouse or human tissue. To compare multiple independent samples of similar tissues (as in **fig. S12A**) we used the median Jaccard index of all pairwise combinations.

### **Comparison of tissue activity of mouse DHSs conserved in human**

For each shared DHS peak, tissue activity was defined as whether the DHS peak was identified via DNase I assay within that tissue (binarization of DHS signal into “accessible” or “inaccessible”). We associated tissues/cell types/experiments into tissue categories and took the union of all accessible DHSs within the datasets comprising the group. As a control, we compared the conservation of tissue activity against human DHSs with shuffled tissue activity profiles by sampling DHS from all shared human DHS without replacement keeping the number sampled constant with the number of active DHSs in each tissue.

### **TF recognition sequence conservation**

To identify positionally conserved transcription factor recognition sequences, predicted

transcription factor binding sites identified with FIMO (see *TF recognition sequence predictions*) within all mouse DHSs were aligned to the human genome, using the “over chain” pairwise alignment downloaded from UCSC Genome Browser (34). We then obtained the human coordinates for the aligned mouse binding sites and overlapped them with predicted transcription factor binding sites in human. Importantly, both mouse and human genomes were scanned using the same motif models. A relaxed threshold (FIMO  $P < 10^{-4}$ ) was used for human genome scans. A motif was labeled as conserved if the same motif was identified in mouse and human and the human motif matched the exact coordinates as the aligned mouse motif.

### **Positional and operational conservation of TF recognition sequences**

Functionally conserved TF recognition sequences was identified by first filtering all DHSs with a one or more positionally conserved TF recognition sequence (see above). We then searched for shared DHSs that contained independent instances in mouse and human of a motif that corresponded to the recognition sequence for the same transcription factor.

### **TF recognition sequence turnover at repurposed DHSs**

To assess the dynamics of TF recognition sequence evolution within shared DHSs with respect to conservation of tissue-specific DNase I accessibility we partitioned DHSs active in each mouse tissue, for both mouse and human, into two groups: conserved and repurposed. For each of these groups, we then computed the proportion of DHSs containing an instance of a motif (FIMO  $P < 10^{-5}$ ). The assumption of this analysis is that the TF recognition sequence density should either be maintained (neutral loss or gain) or increase (net gain) when comparing mouse DHS with conserved accessibility in human vs. DHSs that have been repurposed human. For human, however, we expect to see a relative reduction in TF recognition sequences in a comparison of DHSs with conserved vs. repurposed accessibility. Tissue-selective TF recognition sequences were defined by the motifs enriched ( $P < 10^{-5}$ ) within the tissue-specific clusters (see **fig. 2C**).

### **Comparison of *cis*-regulatory sequence content**

We examined the *cis*-regulatory sequence content between mouse and human tissues by computing the proportion of all DHSs in a tissue (regardless of DHSs sequence or functional conservation) containing at least one instance of each TF recognition sequence (see *TF recognition sequence predictions*; FIMO  $P < 10^{-5}$ ). Brain- and T cell-selective TF recognition sequences were defined by the motifs enriched ( $P < 10^{-4}$ ) within the tissue-specific clusters (see **fig. 2C**).



To assess the similarity of each mouse tissue to all human tissues we computed the Euclidean distance pairwise between the proportions of DHSs contain each TF recognition sequences. When comparing a single tissue to multiple tissues, as in **fig. 5E**, we used the median Euclidean distance between all possible pairwise combinations.

## References and Notes

27. S. John *et al.*, Genome-scale mapping of DNase I hypersensitivity. *Curr Protoc Mol Biol* **Chapter 27**, Unit 21.27 (2013).
28. B. Langmead, C. Trapnell, M. Pop, S. L. Salzberg, Ultrafast and memory-efficient alignment of short DNA sequences to the human genome. *Genom. Biol.* **10**, R25 (2009).
29. S. Neph *et al.*, BEDOPS: high-performance genomic feature operations. *Bioinformatics* **28**, 1919–1920 (2012).
30. S. John *et al.*, Chromatin accessibility pre-determines glucocorticoid receptor binding patterns. *Nat. Genet.* **43**, 264–268 (2011).
31. ENCODE Project Consortium *et al.*, An integrated encyclopedia of DNA elements in the human genome. *Nature* **489**, 57–74 (2012).
32. J. Harrow *et al.*, GENCODE: the reference human genome annotation for The ENCODE Project. *Genom. Res.* **22**, 1760–1774 (2012).
33. P. Flicek *et al.*, Ensembl 2013. *Nucleic Acids Res.* **41**, D48–55 (2013).
34. L. R. Meyer *et al.*, The UCSC Genome Browser database: extensions and updates 2013. *Nucleic Acids Res.* **41**, D64–9 (2013).
35. S. B. Hedges, The origin and evolution of model organisms. *Nat. Rev. Genet.* **3**, 838–849 (2002).
36. W. J. Murphy, T. H. Pringle, T. A. Crider, M. S. Springer, W. Miller, Using genomic data to unravel the root of the placental mammal phylogeny. *Genom. Res.* **17**, 413–421 (2007).
37. O. R. P. Bininda-Emonds *et al.*, The delayed rise of present-day mammals. *Nature* **446**, 507–512 (2007).
38. A. Siepel *et al.*, Evolutionarily conserved elements in vertebrate, insect, worm, and yeast genomes. *Genom. Res.* **15**, 1034–1050 (2005).
39. R. Drmanac *et al.*, Human genome sequencing using unchained base reads on self-assembling DNA nanoarrays. *Science* **327**, 78–81 (2010).
40. B. Vernot *et al.*, Personal and population genomics of human regulatory variation. *Genom. Res.* **22**, 1689–1697 (2012).
41. A. Smit, R. Hubley, P. Green, RepeatMasker Open-3.0 Software Package (available at <http://www.repeatmasker.org>).
42. J. Jurka *et al.*, Repbase Update, a database of eukaryotic repetitive elements. *Cytogenet. Genome Res.* **110**, 462–467 (2005).
43. 1000 Genomes Project Consortium *et al.*, A map of human genome variation from population-scale sequencing. *Nature* **467**, 1061–1073 (2010).

44. M. T. Maurano *et al.*, Systematic localization of common disease-associated variation in regulatory DNA. *Science* **337**, 1190–1195 (2012).
45. D. Arthur, S. Vassilvitskii, *k-means++: the advantages of careful seeding* (Society for Industrial and Applied Mathematics, 2007), pp. 1027–1035.
46. C. E. Grant, T. L. Bailey, W. S. Noble, FIMO: scanning for occurrences of a given motif. *Bioinformatics* **27**, 1017–1018 (2011).
47. T. L. Bailey *et al.*, MEME SUITE: tools for motif discovery and searching. *Nucleic Acids Res.* **37**, W202–8 (2009).
48. V. Matys *et al.*, TRANSFAC and its module TRANSCompel: transcriptional gene regulation in eukaryotes. *Nucleic Acids Res.* **34**, D108–10 (2006).
49. J. C. Bryne *et al.*, JASPAR, the open access database of transcription factor-binding profiles: new content and tools in the 2008 update. *Nucleic Acids Res.* **36**, D102–6 (2008).
50. A. Jolma *et al.*, DNA-binding specificities of human transcription factors. *Cell* **152**, 327–339 (2013).
51. S. Gupta, J. A. Stamatoyannopoulos, T. L. Bailey, W. S. Noble, Quantifying similarity between motifs. *Genom. Biol.* **8**, R24 (2007).
52. C. Y. McLean *et al.*, GREAT improves functional interpretation of cis-regulatory regions. *Nat. Biotechnol.* **28**, 495–501 (2010).

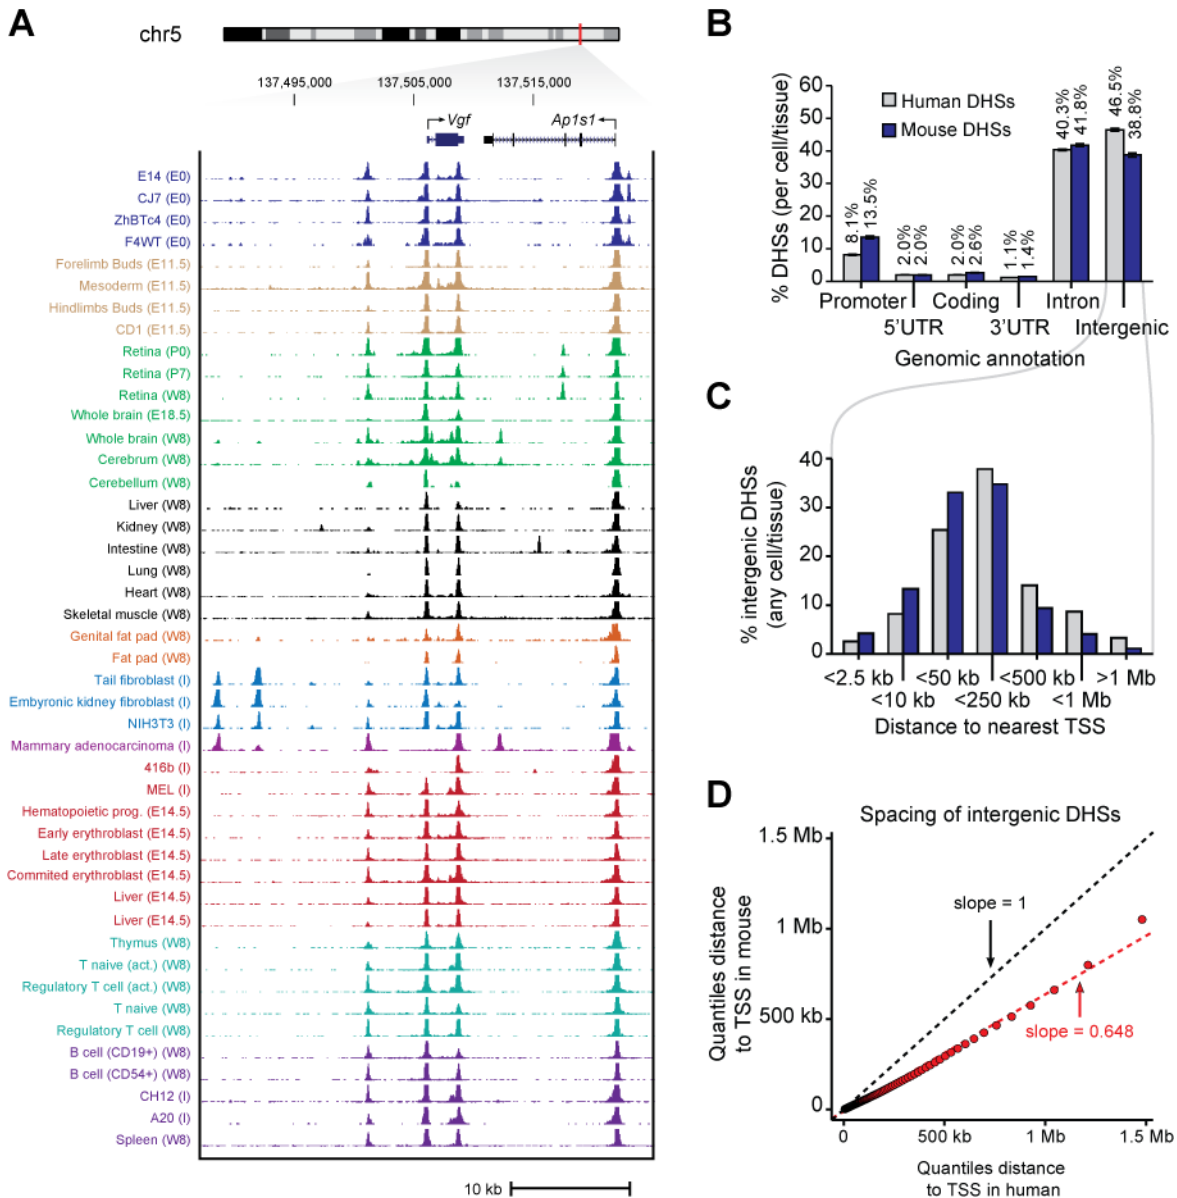

**Figure S1. The accessible landscape of the mouse genome**

(A) Exemplar DNase I cleavage profile within the ~35 kb surrounding the *Vgf* locus in 45 diverse mouse cell and tissue types. (B) Distribution (mean of tissues  $\pm$  SEM) of mouse and human DHSs with respect to genome annotations (per cell- or tissue-type). Promoters are defined as 1 kb upstream of an annotated TSS. (C) Distribution of distances between all intergenic DHSs identified to the nearest annotated TSS in both human and mouse. (D) Q-Q plot of distances from intergenic DHSs to the nearest annotated TSS reveals a linear compression in regulatory DNA spacing. For clarity, the bottom and top 1% of the data points are not shown. Dashed black line, expected relationship between two identical distributions. Red line, linear regression of mouse vs. human distance quantiles.

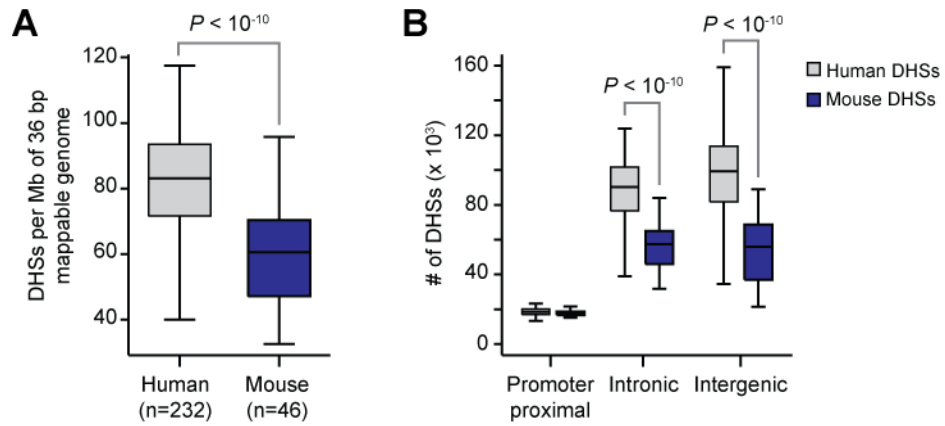

### Figure S2. Expansion of the human *cis*-regulatory landscape

(A) Comparison of densities of the human and mouse DHS landscapes reveals a relative increase in human regulatory DNA ( $P < 10^{-10}$ , Wilcoxon rank-sum test). Densities were normalized by the size of the 36 bp alignable genome. (B) Genomic distribution of DHSs in mouse and human by annotation. Mouse and human have nearly equivalent amounts of promoter proximal DHSs, while human tissues have significant increase in the quantity of distal regulatory elements ( $P < 10^{-10}$ , Wilcoxon rank-sum test).

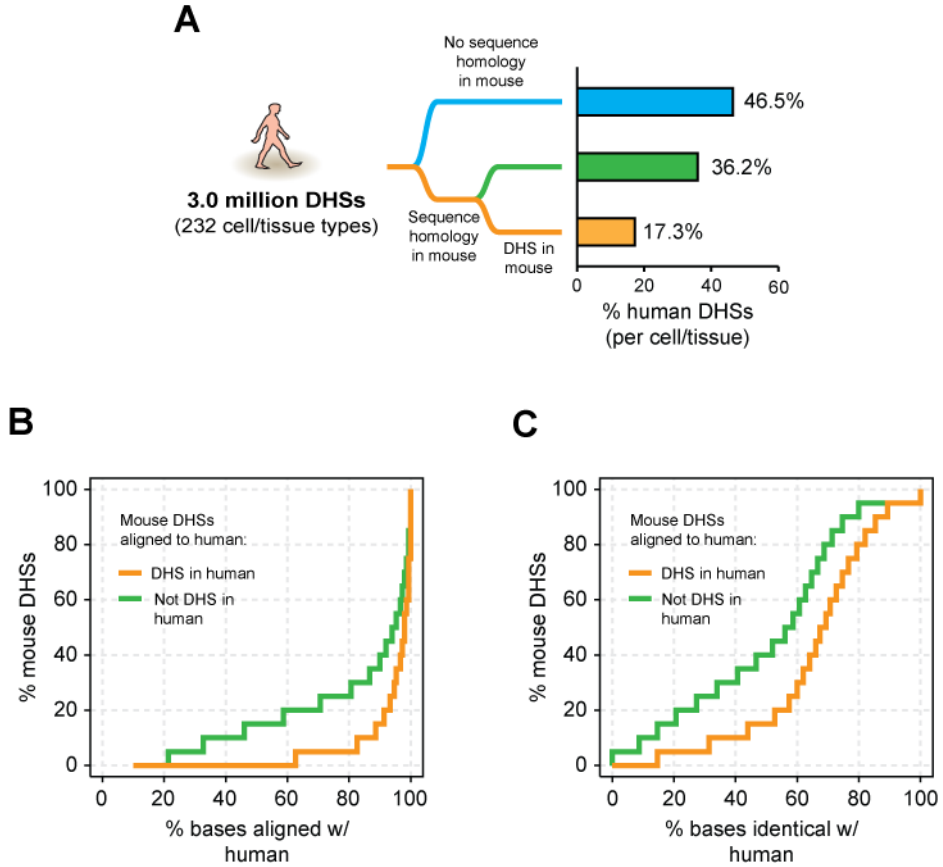

**Figure S3. Sequence and functional alignment of mouse and human DHSs**

(A) Proportions of the human regulatory DNA landscape with sequence homology and functional conservation in mouse. (B) Cumulative fraction of mouse DHSs as a function of the proportion of bases that align to the human using the mm9 to hg19 “over” chain downloaded from the UCSC Genome Browser. (C) Cumulative fraction of mouse DHSs as a function of the proportion of aligned nucleotides identical to human.

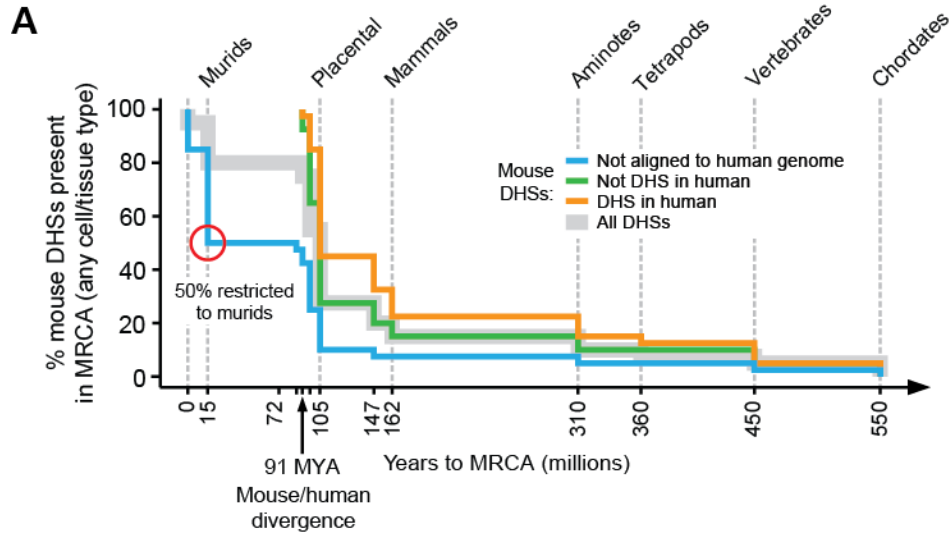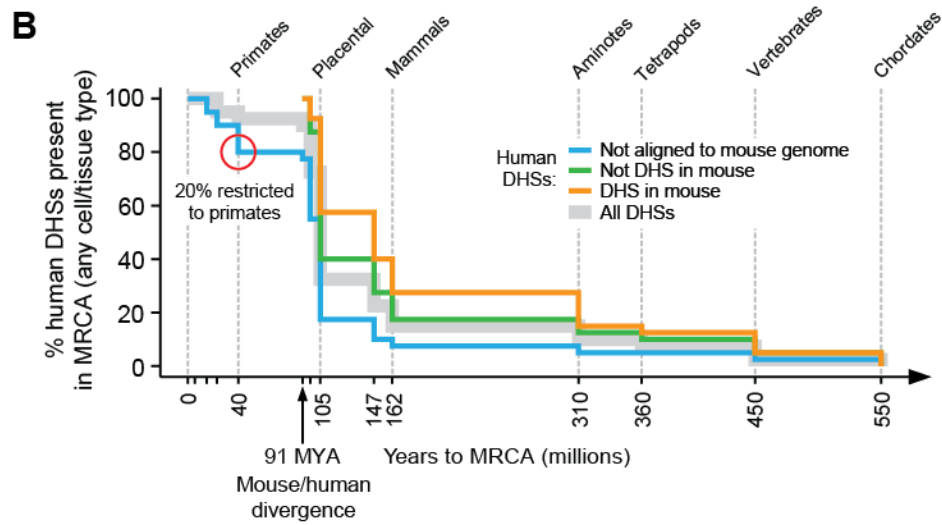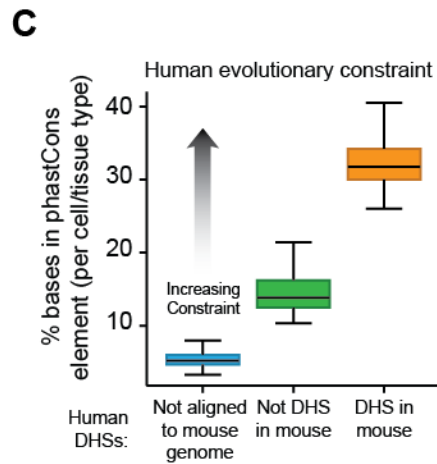

**Figure S4. Evolutionary sequence constraint on mouse and human regulatory DNA**

(A) Proportion of mouse DHSs with conserved sequence across the chordate phylogeny with respect to DHSs conservation with human. (B) Same as A for human DHSs. (C) Percentage of human DHSs containing a conserved phastCons element. Boxes indicate 25%- and 75%-iles for all human tissues. Whiskers denote  $1.5\times$  the interquartile range.

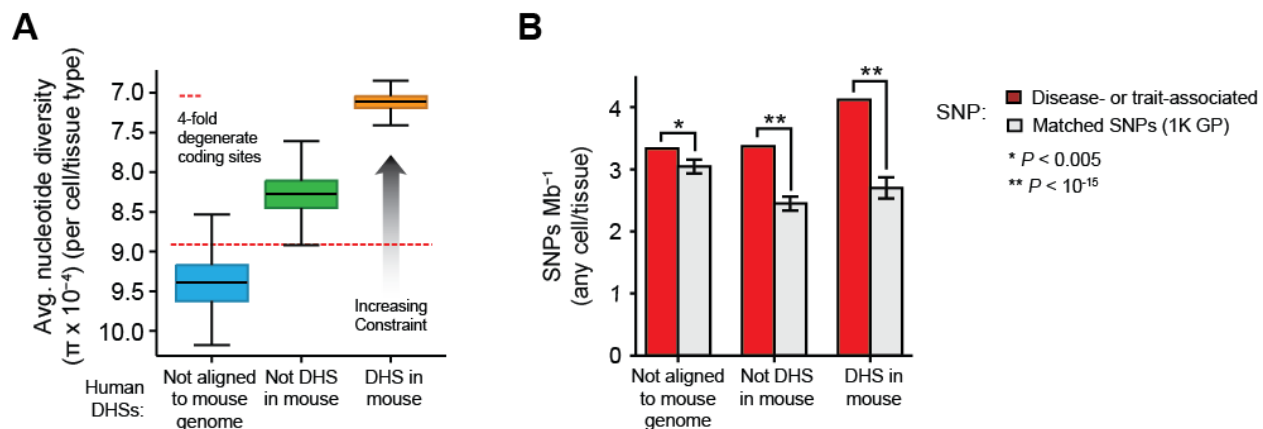

**Figure S5. Recent sequence constraint on regulatory DNA**

(A) Nucleotide diversity ( $\pi$ ) with human DHSs estimated from the complete genomes of 53 unrelated individuals. Boxes indicate the 25%- and 75%-iles for all human tissues. Whiskers denote 1.5 $\times$  the interquartile range. Red dashed line indicates  $\pi$  at four-fold degenerate coding sites. (B) Disease- and trait-associated variants are enriched within both conserved and species-specific regulatory elements. The observed variant density is compared against 1,000 sets of randomly matched SNPs.



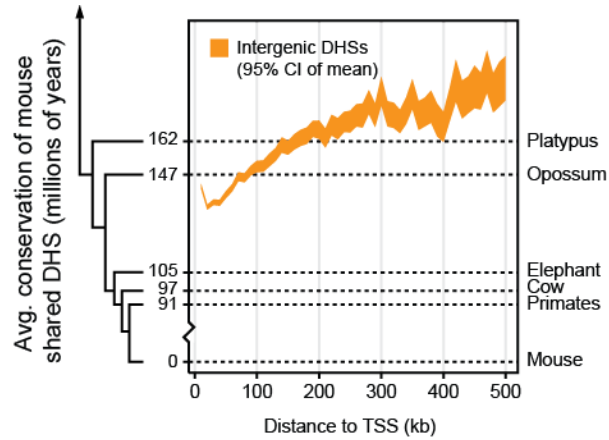

**Figure S6. Increased conservation of far distal elements**

The average conservation of intergenic shared DHSs increases with distance to the nearest TSS. The brown tree shows part of the mammalian phylogeny. Orange shading indicates the 95% percent confidence interval on the mean estimated by bootstrap analysis (500 replicates).

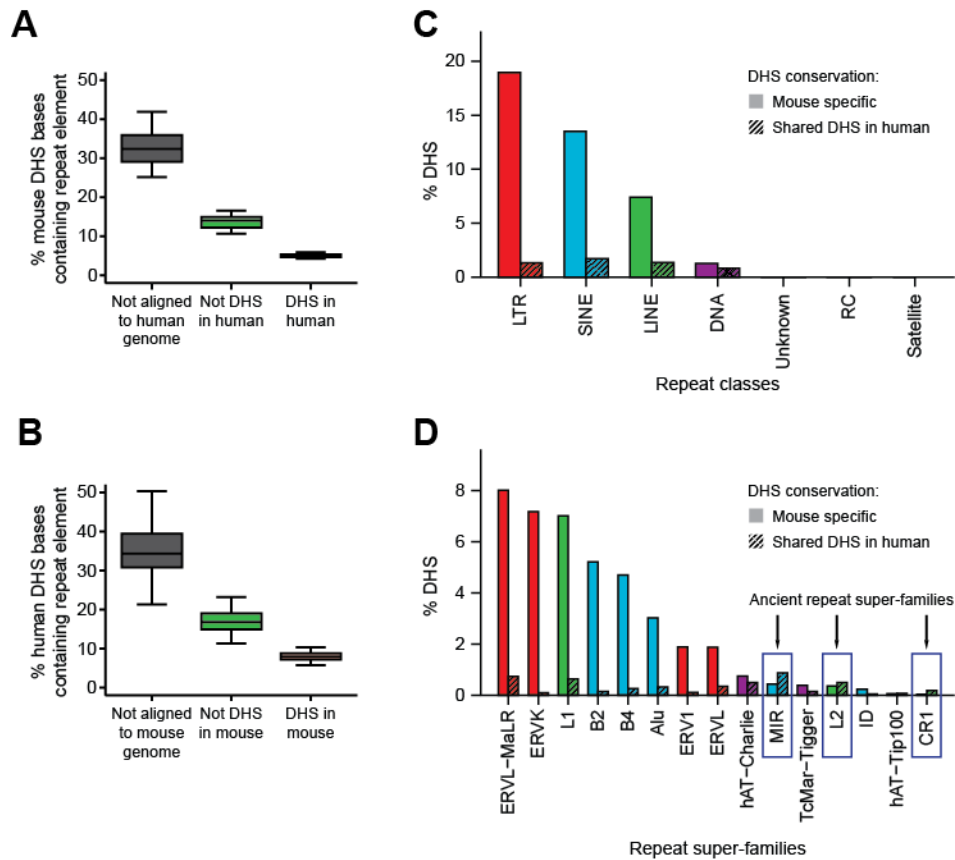

**Figure S7. Repeat-associated innovation of species-specific regulatory DNA**

(A-B) Proportion of the mouse (A) and human (B) DHS landscapes that overlap a repetitive element identified by RepeatMasker. (C) Mouse specific regulatory DNA is enriched for all classes repetitive elements. (D) LTR endogenous retroelements, L1 and SINE elements constitute the majority of mouse specific regulatory DNA that has arisen via repetitive elements. Enrichment of ancient repeat-families (blue boxes; SINE/MIR, LINE/L2 and LINE/CR1) within conserved DHSs indicate that repetitive elements contributed to innovations in mammalian regulatory DNA long before the mouse and human divergence ~91 MYA.

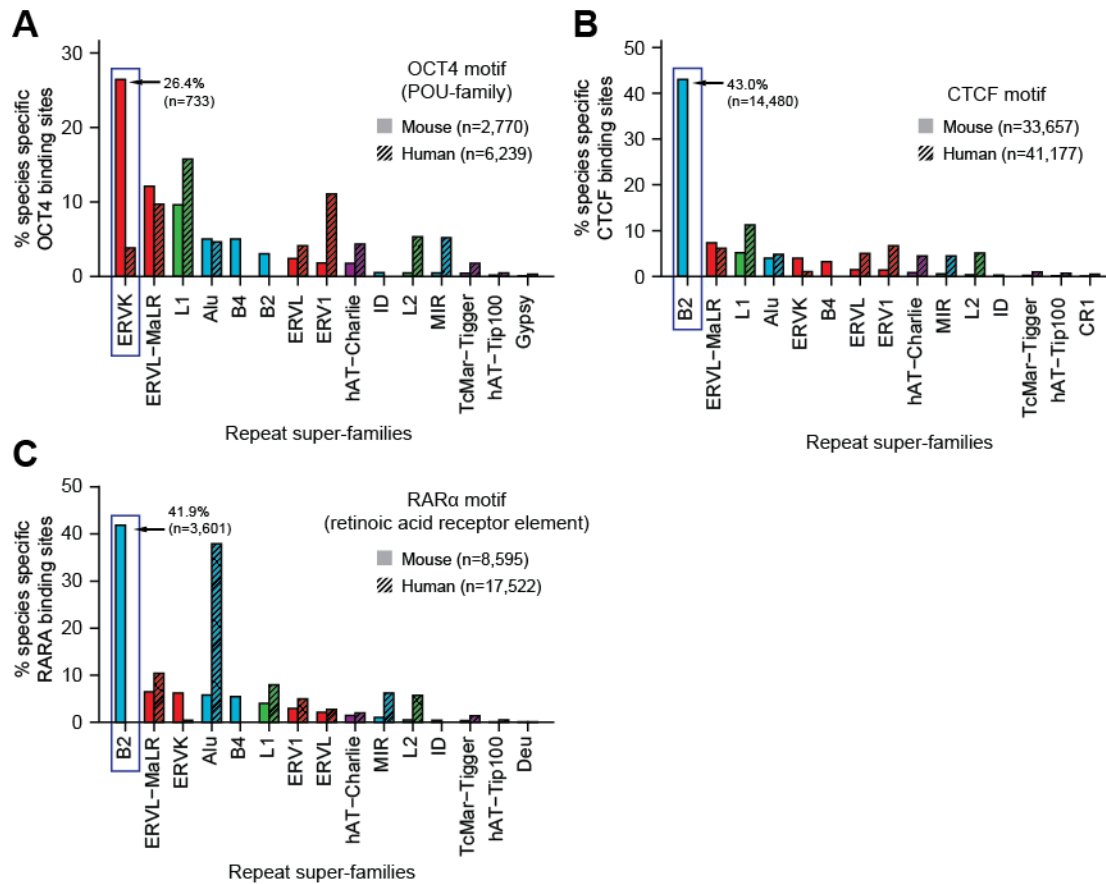

**Figure S8. Stereotypical expansion of TF binding sites on specific repetitive elements**

Examples of repeat mediated expansions of TF recognition sequences. (A) Many of the sequence elements recognized by the POU family of TFs that includes the canonical pluripotency master-regulator OCT4, has arisen on LTR/ERVL retrotransposable elements. (B) Enrichment of mouse specific CTCF recognition sequences within rodent specific SINE/B2 elements. (C) Retinoic acid receptor elements sequences (represented by RAR $\alpha$ ) have also expanded on SINE/B2 elements.

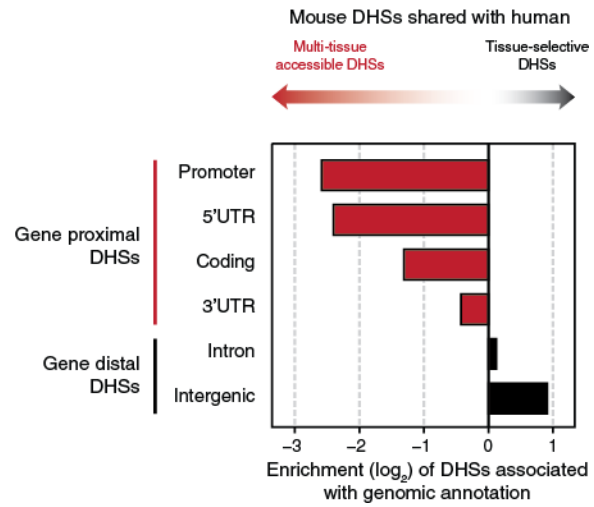

**Figure S9. Tissue-selective DHSs are predominantly distal to genes**

Enrichment ( $\log_2$ ) of tissue-selective shared DHSs categorized by genomic annotation.

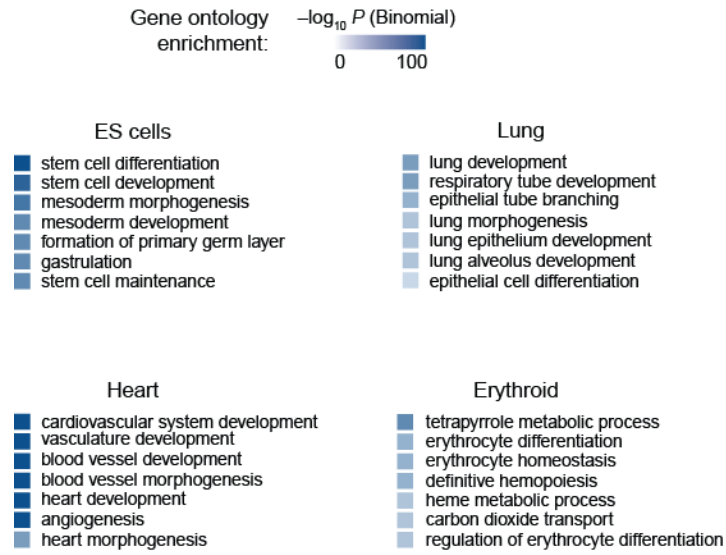

**Figure S10. Shared DHSs localize to genes important in development and differentiation**

Gene ontology terms associated with tissue-selective DHSs in mouse discovered using GREAT (52).

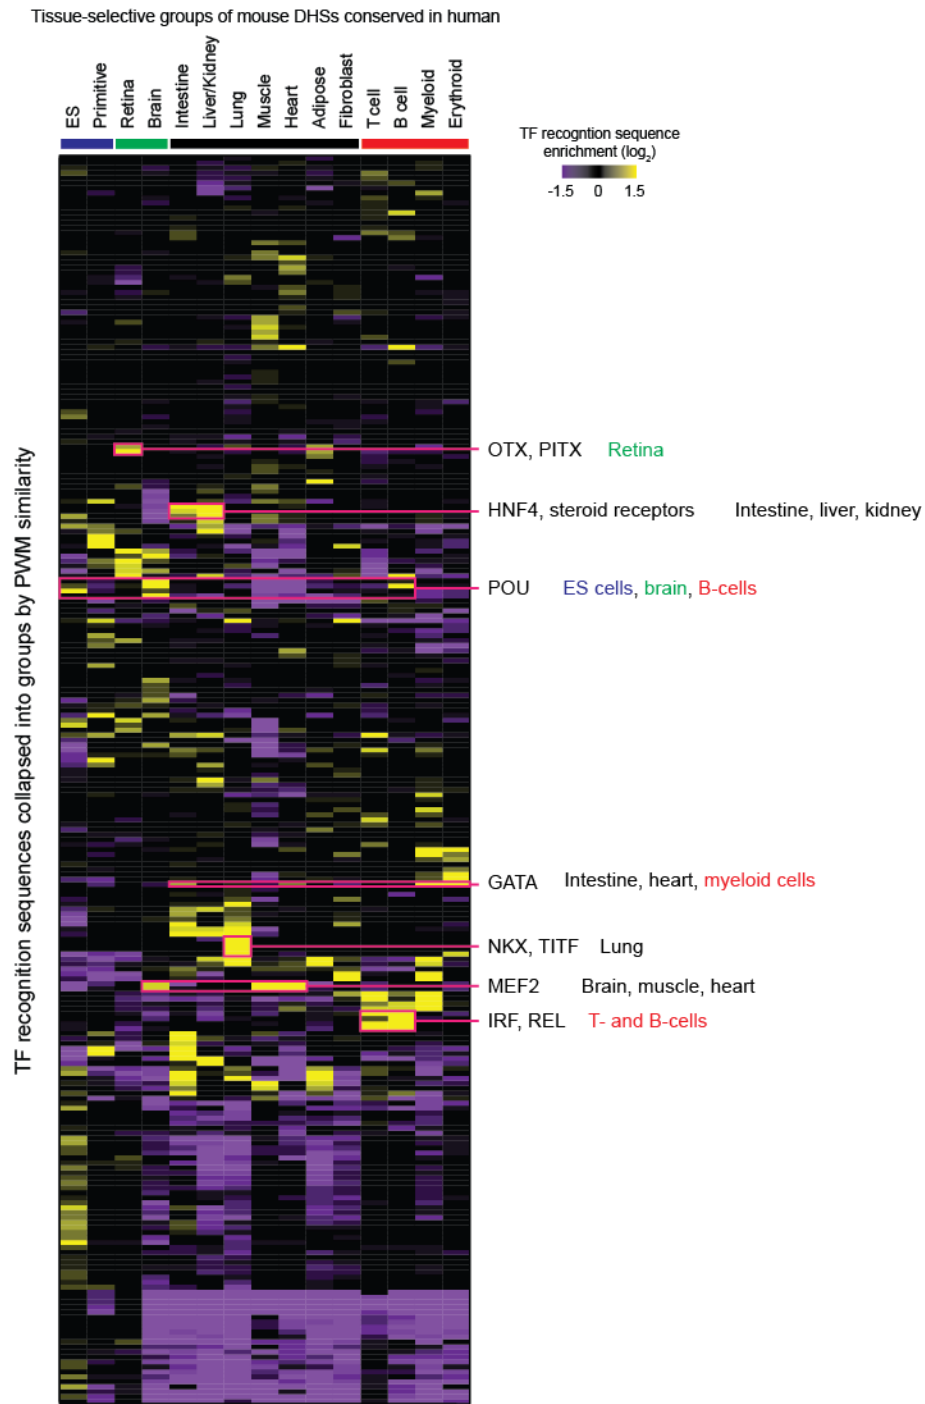

**Figure S11. Content and localization of tissue-selective shared DHSs in mouse**

Individual position weight matrices were clustered to form groups of transcription factors with similar recognition sequences. Each cell indicates the enrichment of individual PWM instances comprising the group (rows) in the tissue-selective mouse DHSs conserved in human (columns).

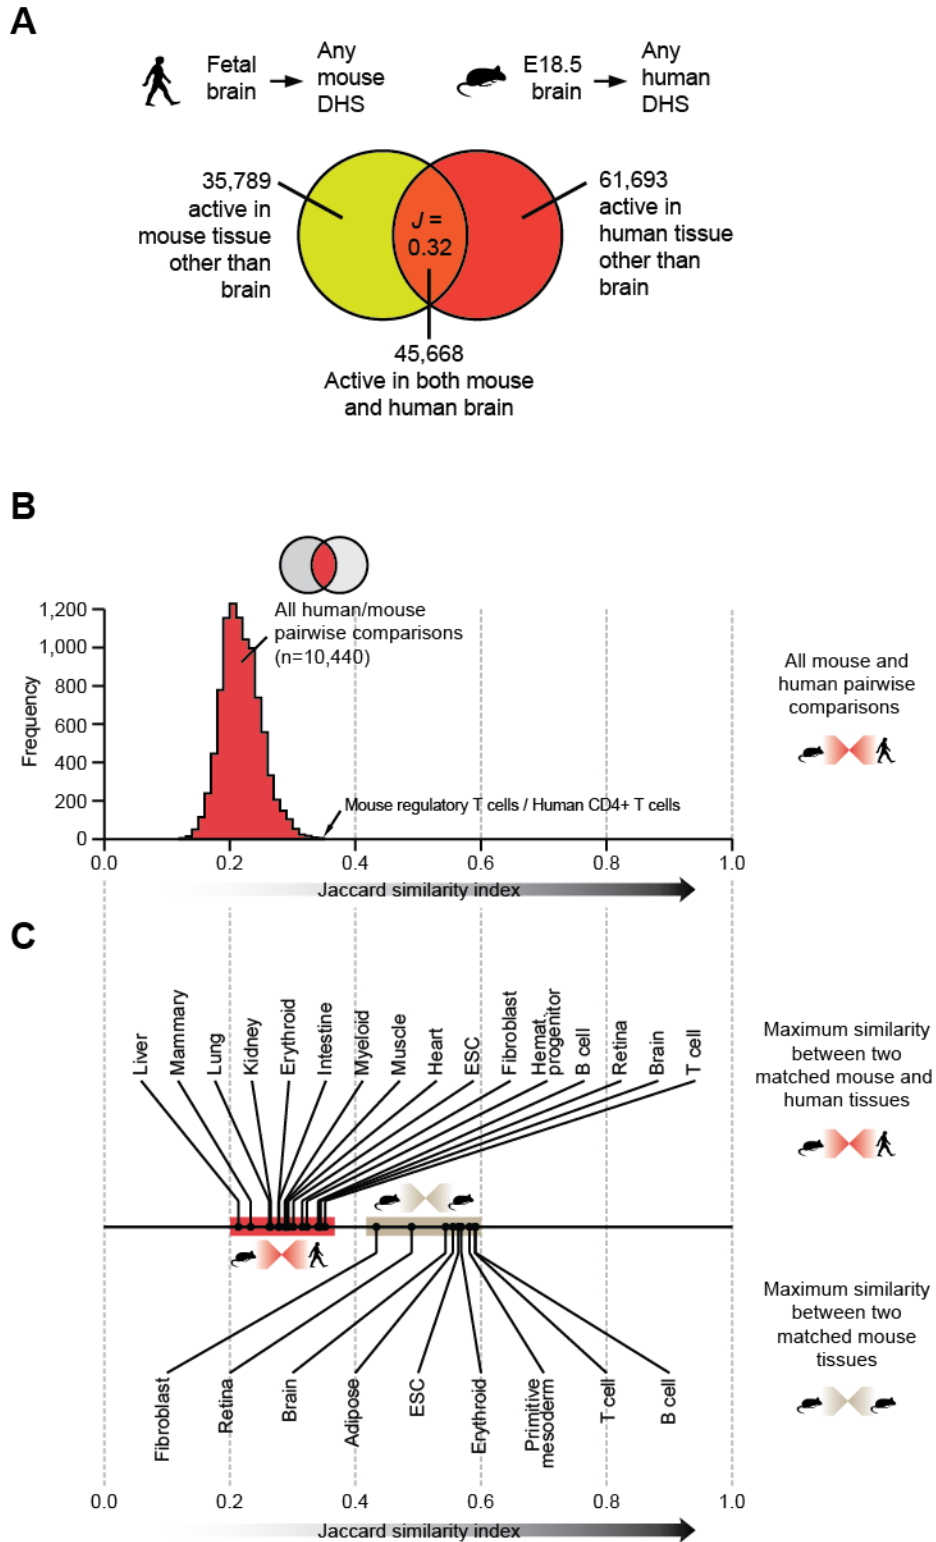

**Figure S12. Conservation of accessibility within shared DHSs**

(A) Usage of the shared DHS landscape in human fetal brain and mouse embryonic brain indicate

limited conservation in tissue-level accessibility patterns. (B) Histogram of all pairwise Jaccard similarity indices comparing the shared accessibility of DHSs common to both mouse and human tissues. (C) The maximum shared DHS landscape usage between matched mouse and human tissues (top, red) is markedly lower than a similar comparison between comparing mouse tissues with similar embryological origins (bottom, brown).



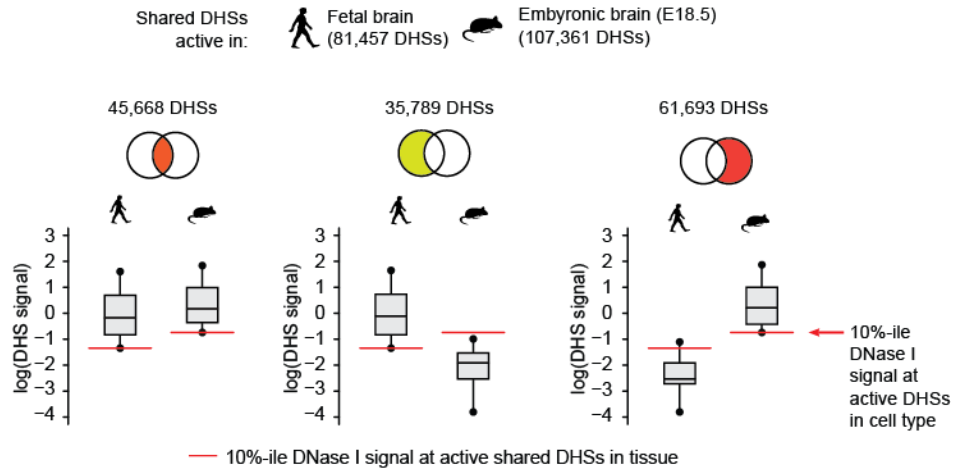

**Figure S13. Identification of conserved and repurposed DHSs is robust to DNase I cleavage intensity**

Box plots show the normalized DNase I cleavage intensity within mouse and human shared DHSs active in fetal and embryonic brain. Left, shared DHSs active in both mouse and human brain. Middle, shared DHSs active in human brain, but not active in mouse embryonic brain. Right, shared DHS active in mouse brain, but not active in human fetal brain. Boxes indicate the 25%- and 75%-iles and the whiskers denote the 10%- and 90%-iles. Red line indicates the DNase I cleavage intensity at the weakest 10% shared DHSs in each tissues.

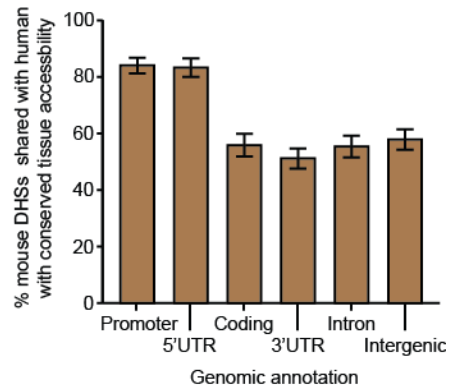

**Figure S14. Genomic distribution of shared DHSs with conserved tissue accessibility**

The proportion (mean of tissues  $\pm$  SEM) of DHSs with conserved tissue accessibility within each genomic compartment. Promoters are defined as 1 kb upstream of an annotated TSS.

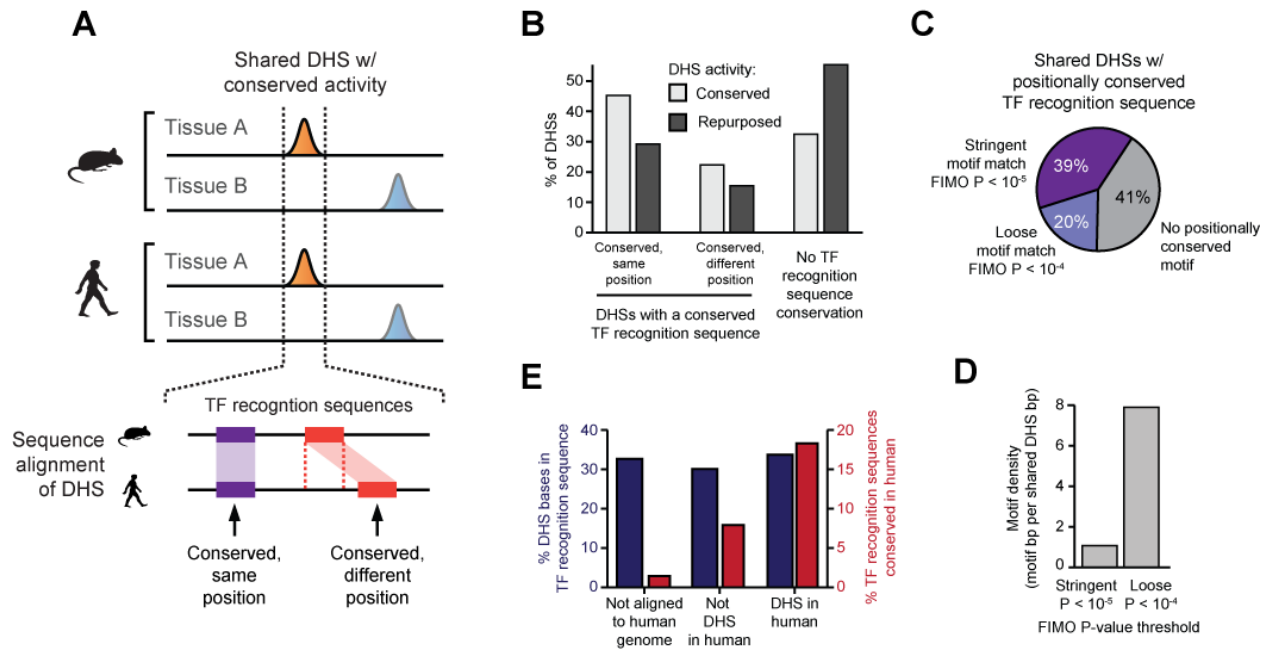

**Figure S15. Conservation of transcription factor recognition sequences within DHS**

(A) Model depicting the relationship of TF recognition sequences and conservation of accessibility at shared DHSs. DHSs with similar tissues activity patterns contain positionally and/or operationally conserved TF recognition sequences. (B) DHSs with conserved activity patterns are more likely to contain at least one conserved TF recognition sequences when compared to DHSs with repurposed activity ( $\chi^2$  test,  $P$ -value  $< 10^{-15}$ ). Light grey, percentages of shared DHSs with conserved activity patterns containing conserved recognition elements. Dark gray, same for DHSs with repurposed activity patterns. (C–D) Effect of motif thresholds on the identification of conserved motifs. (C) Proportion of mouse DHSs shared with human that contain a positionally conserved transcription factor recognition sequence at stringent (purple) and relaxed (lavender) thresholds. (D) The number of putative TF recognition sequences increases drastically with reduced  $P$ -value thresholds. (E) The density (blue, % of DHS covered by TF recognition sequences) of TF recognition sequences within mouse DHSs is uniform across with respect to functional conservation, while the proportion of TF recognition sequence base-pairs conserved (red, % of TF recognition sequence bases conserved) is increased in mouse DHSs conserved in human.

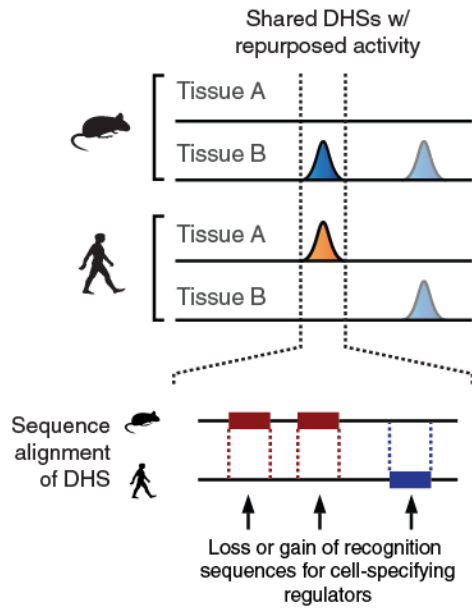

**Figure S16. TF recognition sequence dynamics at repurposed DHSs**

Model depicting the relationship of TF recognition sequence turnover and the repurposing of DHSs. The loss or gain of recognition sequences for cell-specifying TFs within individual DHSs underpin the cell and tissue activity patterns of regulatory DNA.

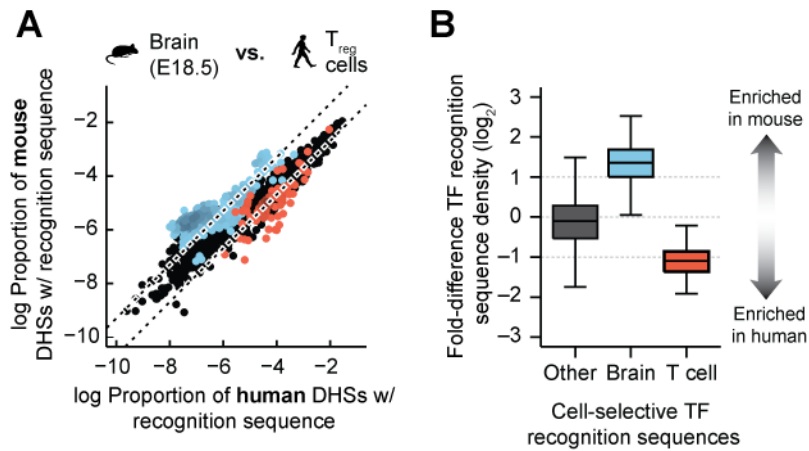

**Figure S17. Comparison of TF recognition sequence densities between different mouse and human reveals cell-selective regulators**

(A) Scatterplot of TF recognition sequence density in human fetal brain to mouse regulatory T cells. The recognition sequences enriched in brain or T cells (identified in **fig. 2C**) are colored blue and red, respectively. Dotted black lines demarcate a 2-fold difference in density between mouse and human. (B) The relative fold-difference ( $\log_2$ ) in density of TF recognition sequences. Boxes indicate the 25%- and 75%-ile and the whiskers denote 1.5 $\times$  the interquartile range.

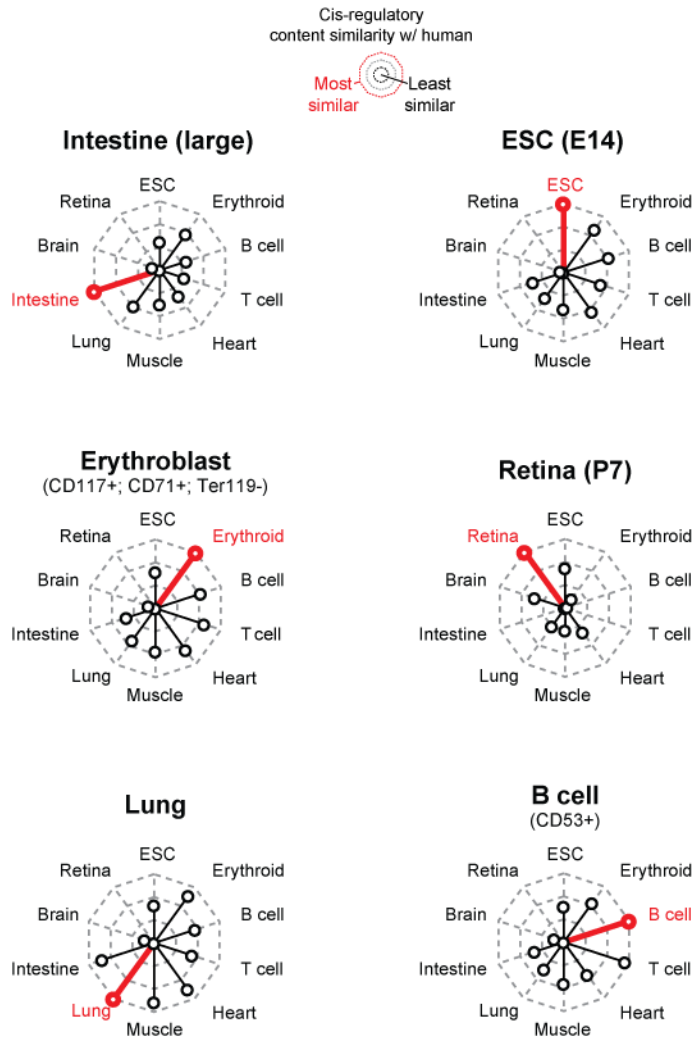

**Figure S18. Conservation of *cis*-regulatory content between mouse and human tissues**

Radar plots showing the median similarity (Euclidean distance between the distributions of TF recognition sequence densities) of the *cis*-regulatory content between mouse and human tissues.

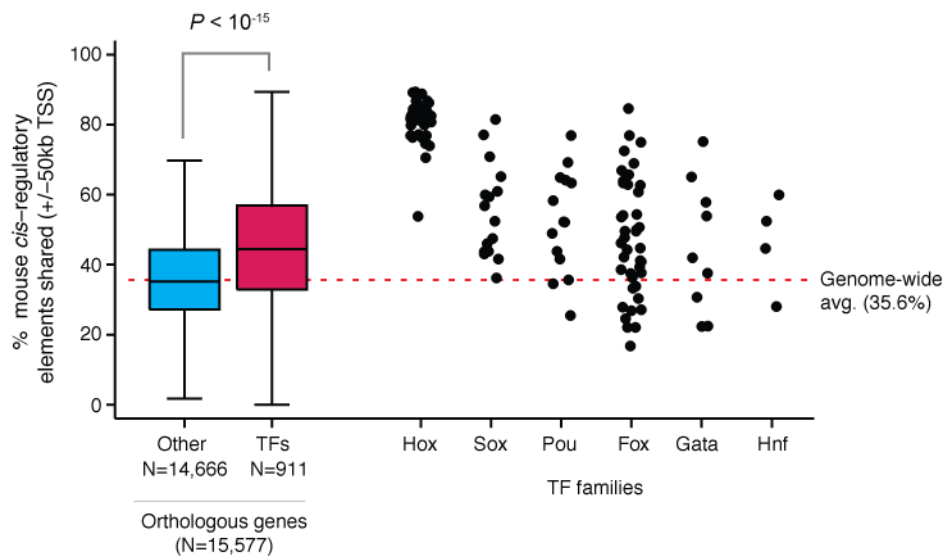

**Figure S19. Preferential conservation of *cis*-regulatory elements surrounding transcription factor genes**

Conservation of *cis*-regulatory elements  $\pm 50$ kb surrounding the transcription start sites of mouse genes with human orthologs. Genes that are not annotated as transcription factors (blue) have less *cis*-regulatory conservation than genes annotated as transcriptions factors (pink) (Wilcoxon rank-sum test,  $P < 10^{-15}$ ). Stripcharts on the right show the *cis*-regulatory conservation surrounding TF genes grouped by canonical TF families. Dash red line indicates the genome-wide average (35.6%) DHS conservation between mouse and human.

**Table S1. Mouse cell- and tissue-types used in this study**

Overview of strain, developmental age and DHS mapping statistics for each mouse tissue used within this study.

**Table S2. Overview of human cell- and tissue-types used in this study**

Overview of developmental age and DHS mapping statistics for each human tissue used within this study.

**Table S3. Conservation of mouse DHSs in human by cell- and tissue-type**

Conservation statistics for DHSs identified within individual mouse tissues.

**Table S4. Conservation of human DHSs in mouse by cell- and tissue-type**

Conservation statistics for DHSs identified within individual human tissues.



**Table S1**

| Cell- or tissue-type                | Strain*           | Age#  | Tissue         | GEO Accession | SPOT  | Tags        | Tags (-chrM) | DHS peaks (FDR 1%) | Downsampled DHS peaks (FDR 1%) |
|-------------------------------------|-------------------|-------|----------------|---------------|-------|-------------|--------------|--------------------|--------------------------------|
| E14                                 | 129/Ola           | E0    | ES             | GSM1014154    | 0.457 | 33,828,611  | 32,646,012   | 175,237            | 165,014                        |
| CJ7                                 | 129S1/SVimJ       | E0    | ES             | GSM1014187    | 0.427 | 35,432,673  | 35,123,245   | 161,628            | 146,807                        |
| ZhBTc4                              | 129/Ola           | E0    | ES             | GSM1014169    | 0.558 | 30,861,073  | 29,216,912   | 164,855            | 158,561                        |
| ESC (F4WT)                          | WW6               | E0    | ES             | GSM1014159    | 0.427 | 24,221,226  | 23,283,969   | 167,073            | 167,055                        |
| 416b                                | B6D2F1/J          | I     | Myeloid        | GSM1014163    | 0.538 | 42,933,235  | 40,389,545   | 141,483            | 129,350                        |
| MEL                                 | Unknown           | I     | Erythroid      | GSM1014191    | 0.502 | 28,778,970  | 28,632,367   | 129,572            | 125,720                        |
| Erythroblast (CD117+;CD71-;Ter119-) | CD-1              | E14.5 | Hem. Prog.     | GSM1014155    | 0.435 | 26,102,618  | 26,038,902   | 147,180            | 146,269                        |
| Erythroblast (CD117+;CD71+;Ter119-) | CD-1              | E14.5 | Erythroid      | GSM1014158    | 0.491 | 26,514,730  | 26,250,932   | 116,843            | 115,265                        |
| Erythroblast (CD117-;CD71+;Ter119+) | CD-1              | E14.5 | Erythroid      | GSM1014156    | 0.324 | 39,265,301  | 39,135,425   | 74,521             | 68,271                         |
| Erythroblast (CD117+;CD71+;Ter119+) | CD-1              | E14.5 | Erythroid      | GSM1014157    | 0.406 | 51,563,832  | 51,115,669   | 109,017            | 95,539                         |
| Naïve T cell (activated)            | C57BL/6*          | W8    | T cell         | GSM1014149    | 0.557 | 28,386,529  | 28,157,831   | 85,736             | 83,850                         |
| Regulatory T cell (activated)       | C57BL/6*          | W8    | T cell         | GSM1014200    | 0.543 | 32,305,988  | 32,264,326   | 100,369            | 97,162                         |
| Naïve T cell (resting)              | C57BL/6*          | W8    | T cell         | GSM1014192    | 0.519 | 33,637,621  | 33,535,765   | 100,535            | 93,602                         |
| Regulatory T cell (resting)         | C57BL/6*          | W8    | T cell         | GSM1014148    | 0.560 | 28,564,791  | 28,422,561   | 93,807             | 91,491                         |
| B cell (CD19+)                      | C57BL/6*          | W8    | B cell         | GSM1014190    | 0.425 | 28,983,865  | 28,854,216   | 94,291             | 92,120                         |
| B cell (CD53+)                      | C57BL/6J          | W8    | B cell         | GSM1014170    | 0.491 | 29,461,779  | 29,172,586   | 92,539             | 88,889                         |
| Liver                               | 129*              | E14.5 | Erythroid      | GSM1014162    | 0.367 | 29,791,189  | 29,512,936   | 102,545            | 97,849                         |
| Liver                               | C57BL/6J          | E14.5 | Erythroid      | GSM1014183    | 0.351 | 44,019,764  | 43,575,379   | 112,444            | 97,047                         |
| Liver                               | C57BL/6J          | W8    | Liver          | GSM1014195    | 0.423 | 19,812,754  | 19,748,170   | 104,995            | 104,979                        |
| A20 (lymphoma)                      | BALB/cAnN         | I     | B cell         | GSM1014167    | 0.446 | 29,879,112  | 29,050,553   | 123,283            | 120,322                        |
| Mammary adenocarcinoma              | Rlll              | I     | Mammary        | GSM1014196    | 0.686 | 32,345,915  | 32,111,316   | 91,073             | 84,282                         |
| Whole brain                         | C57BL/6J          | E18.5 | Brain          | GSM1014197    | 0.483 | 25,257,085  | 25,249,691   | 167,715            | 166,503                        |
| Whole brain                         | C57BL/6J          | W8    | Brain          | GSM1014151    | 0.689 | 36,089,477  | 36,079,464   | 224,978            | 204,809                        |
| Cerebrum                            | C57BL/6J          | W8    | Brain          | GSM1014168    | 0.437 | 43,877,302  | 43,834,852   | 242,095            | 201,693                        |
| Cerebellum                          | C57BL/6J          | W8    | Brain          | GSM1014164    | 0.397 | 21,727,916  | 21,690,965   | 106,514            | 106,499                        |
| Lung                                | C57BL/6J          | W8    | Lung           | GSM1014194    | 0.423 | 21,041,166  | 20,978,206   | 163,431            | 163,463                        |
| Kidney                              | C57BL/6J          | W8    | Kidney         | GSM1014193    | 0.451 | 46,472,928  | 46,357,946   | 184,503            | 160,029                        |
| Fat pad (mammary)                   | C57BL/6J          | W8    | Adipose        | GSM1014165    | 0.355 | 19,628,835  | 19,566,613   | 139,661            | 139,658                        |
| Fibroblast (tail)                   | C57BL/6J          | I     | Fibroblast     | GSM1014199    | 0.580 | 36,767,603  | 30,042,276   | 163,505            | 156,571                        |
| Fibroblast (NIH3T3)                 | NIH/Swiss         | I     | Fibroblast     | GSM1014177    | 0.516 | 30,124,872  | 28,204,510   | 131,639            | 129,066                        |
| Fibroblast (embryonic kidney)       | Spretus.BL6-Xist  | I     | Fibroblast     | GSM1014171    | 0.463 | 25,485,737  | 22,217,276   | 137,147            | 137,138                        |
| Heart                               | C57BL/6J          | W8    | Heart          | GSM1014166    | 0.433 | 28,947,564  | 28,077,411   | 146,214            | 141,807                        |
| Embryo (headless)                   | CD-1              | E11.5 | Prim. mesoderm | GSM1014172    | 0.402 | 29,943,418  | 29,909,171   | 149,434            | 138,370                        |
| Embryo (forelimb buds)              | CD-1              | E11.5 | Prim. mesoderm | GSM1014174    | 0.458 | 26,816,011  | 26,734,717   | 150,619            | 147,330                        |
| Fat pad (genital)                   | C57BL/6J          | W8    | Adipose        | GSM1014173    | 0.439 | 25,555,735  | 24,690,742   | 169,155            | 169,143                        |
| Embryo (hindlimb buds)              | CD-1              | E11.5 | Prim. mesoderm | GSM1014179    | 0.389 | 30,266,505  | 30,132,401   | 157,008            | 144,567                        |
| Embryo (mesoderm)                   | CD-1              | E11.5 | Prim. mesoderm | GSM1014178    | 0.456 | 103,121,762 | 102,805,749  | 228,571            | 148,193                        |
| Intestine (large)                   | C57BL/6J          | W8    | Intestine      | GSM1014186    | 0.398 | 30,356,956  | 29,995,670   | 131,435            | 129,237                        |
| Muscle (skeletal)                   | C57BL/6J          | W8    | Muscle         | GSM1014189    | 0.389 | 102,881,281 | 97,647,043   | 193,949            | 126,944                        |
| Retina                              | C57BL/6J          | W8    | Retina         | GSM1014175    | 0.323 | 28,638,758  | 28,252,986   | 100,570            | 97,088                         |
| Retina                              | C57BL/6J          | D7    | Retina         | GSM1014198    | 0.418 | 27,024,790  | 26,973,855   | 109,073            | 108,605                        |
| Retina                              | C57BL/6J          | D0    | Retina         | GSM1014188    | 0.484 | 36,128,496  | 35,959,145   | 134,712            | 123,526                        |
| Spleen                              | C57BL/6J          | W8    | B cell         | GSM1014182    | 0.610 | 25,037,085  | 24,916,157   | 86,664             | 86,661                         |
| Thymus                              | C57BL/6J          | W8    | T cell         | GSM1014185    | 0.495 | 26,399,759  | 26,286,891   | 105,449            | 103,977                        |
| CH12 (lymphoma)                     | B10.H-2aH-4bp/Wts | I     | B cell         | GSM1014153    | 0.536 | 68,983,868  | 68,760,538   | 171,305            | 141,262                        |

Total distinct peaks

1,334,703

\* indicates that the substrain is not known

# E = days post-conception, D = days post-natal, W = weeks post-natal, I = immortalized or malignant

**Table S2**

| Cell- or tissue-type | Source | Age# | Tissue       | GEO Accession | SPOT  | Tags       | Tags (-chrM) | DHS peaks (FDR 1%) |
|----------------------|--------|------|--------------|---------------|-------|------------|--------------|--------------------|
| A549                 | ENCODE |      | Lung         | GSM736580     | 0.438 | 33,328,713 | 20,075,666   | 118,965            |
| AG04449              | ENCODE |      | Fibroblast   | GSM736562     | 0.462 | 29,035,304 | 22,616,899   | 166,158            |
| AG04450              | ENCODE |      | Fibroblast   | GSM736514     | 0.464 | 27,024,153 | 22,671,606   | 148,086            |
| AG09309              | ENCODE |      | Fibroblast   | GSM736551     | 0.695 | 38,396,845 | 26,118,731   | 201,320            |
| AG09319              | ENCODE |      | Fibroblast   | GSM736531     | 0.670 | 28,332,355 | 19,707,391   | 141,216            |
| AG10803              | ENCODE |      | Fibroblast   | GSM736598     | 0.747 | 33,534,037 | 25,715,256   | 171,180            |
| AoAF                 | ENCODE |      | Blood vessel | GSM736583     | 0.716 | 38,226,561 | 31,210,444   | 173,907            |
| BE2_C                | ENCODE |      | Brain        | GSM736508     | 0.614 | 44,063,888 | 42,391,862   | 175,969            |
| BJ                   | ENCODE |      | Fibroblast   | GSM736518     | 0.749 | 42,763,886 | 24,605,012   | 162,086            |
| CACO2                | ENCODE |      | Intestine    | GSM736500     | 0.707 | 27,117,636 | 25,576,071   | 122,479            |
| CD14                 | ENCODE |      | Myeloid      | GSM736513     | 0.429 | 67,698,560 | 67,035,406   | 175,178            |
| CD19                 | REMC   | y34  | B cell       | GSM701493     | 0.483 | 24,575,305 | 23,887,915   | 84,515             |
| CD20                 | ENCODE |      | B cell       | GSM1024765    | 0.572 | 36,983,818 | 36,413,583   | 104,139            |
| CD34                 | REMC   | y33  | Hem. prog.   | GSM530657     | 0.769 | 22,001,770 | 21,463,361   | 139,457            |
| CD34                 | ENCODE |      | Hem. prog.   | GSM1024770    | 0.691 | 49,756,223 | 48,561,124   | 164,050            |
| CD4                  | REMC   | y37  | T cell       | GSM701539     | 0.625 | 28,031,950 | 27,199,471   | 93,360             |
| CD4pos_N             | ENCODE |      | T cell       | GSM1024789    | 0.356 | 24,083,134 | 22,482,769   | 82,384             |
| CMK                  | ENCODE |      | Myeloid      | GSM736607     | 0.572 | 31,319,078 | 21,490,670   | 133,032            |
| fAdrenal             | REMC   | d96  | Adrenal      | GSM530653     | 0.440 | 27,428,606 | 27,094,195   | 188,072            |
| fAdrenal             | REMC   | d85  | Adrenal      | GSM665799     | 0.352 | 33,450,853 | 32,872,463   | 181,935            |
| fAdrenal             | REMC   | d108 | Adrenal      | GSM817167     | 0.313 | 28,128,420 | 27,626,714   | 136,447            |
| fAdrenal             | REMC   | d101 | Adrenal      | GSM1027311    | 0.291 | 44,006,828 | 43,589,652   | 180,997            |
| fAdrenal             | REMC   | d113 | Adrenal      | GSM878658     | 0.358 | 36,200,139 | 34,885,120   | 199,720            |
| fBrain               | REMC   | d122 | Brain        | GSM530651     | 0.720 | 25,521,213 | 25,472,137   | 182,501            |
| fBrain               | REMC   | d117 | Brain        | GSM595920     | 0.590 | 25,078,460 | 25,016,845   | 195,888            |
| fBrain               | REMC   | d85  | Brain        | GSM595923     | 0.405 | 23,665,122 | 23,608,044   | 184,688            |
| fBrain               | REMC   | d96  | Brain        | GSM595928     | 0.555 | 20,987,395 | 20,887,542   | 177,090            |
| fBrain               | REMC   | d112 | Brain        | GSM665804     | 0.386 | 34,750,897 | 34,671,585   | 191,014            |
| fBrain               | REMC   | d142 | Brain        | GSM665819     | 0.434 | 34,909,221 | 34,462,349   | 167,734            |
| fBrain               | REMC   | d101 | Brain        | GSM878650     | 0.416 | 30,829,149 | 30,786,898   | 216,130            |
| fBrain               | REMC   | d104 | Brain        | GSM878651     | 0.584 | 35,036,073 | 34,982,802   | 191,232            |
| fBrain               | REMC   | d109 | Brain        | GSM878652     | 0.436 | 24,953,459 | 24,905,787   | 178,475            |
| fBrain               | REMC   | d105 | Brain        | GSM1027328    | 0.490 | 35,021,221 | 34,978,828   | 204,455            |
| fHeart               | REMC   | d96  | Heart        | GSM530654     | 0.580 | 25,623,855 | 25,253,759   | 173,135            |
| fHeart               | REMC   | d101 | Heart        | GSM530661     | 0.540 | 32,812,462 | 26,756,542   | 209,039            |
| fHeart               | REMC   | d117 | Heart        | GSM665809     | 0.574 | 20,497,225 | 20,237,506   | 157,105            |
| fHeart               | REMC   | d103 | Heart        | GSM665814     | 0.560 | 24,283,747 | 23,937,451   | 172,946            |
| fHeart               | REMC   | d147 | Heart        | GSM665824     | 0.412 | 34,249,454 | 33,857,207   | 187,545            |
| fHeart               | REMC   | d110 | Heart        | GSM665830     | 0.649 | 36,948,524 | 36,362,253   | 189,064            |
| fHeart               | REMC   | d105 | Heart        | GSM774203     | 0.600 | 57,235,297 | 56,289,045   | 220,074            |
| fHeart               | REMC   | d120 | Heart        | GSM878630     | 0.596 | 39,316,934 | 38,082,008   | 217,926            |
| fHeart               | REMC   | d91  | Heart        | GSM817220     | 0.585 | 34,557,454 | 33,668,945   | 202,827            |
| fIntestine_Lg        | REMC   | d103 | Intestine    | GSM665815     | 0.343 | 25,940,579 | 25,753,257   | 148,014            |
| fIntestine_Lg        | REMC   | d105 | Intestine    | GSM665818     | 0.367 | 26,525,135 | 26,385,840   | 165,904            |
| fIntestine_Lg        | REMC   | d110 | Intestine    | GSM665826     | 0.391 | 36,983,856 | 36,509,010   | 174,469            |
| fIntestine_Lg        | REMC   | d107 | Intestine    | GSM701490     | 0.357 | 21,461,793 | 21,194,682   | 165,770            |
| fIntestine_Lg        | REMC   | d108 | Intestine    | GSM701495     | 0.439 | 27,932,860 | 27,773,196   | 84,894             |
| fIntestine_Lg        | REMC   | d115 | Intestine    | GSM774213     | 0.391 | 22,437,785 | 22,188,540   | 147,422            |
| fIntestine_Lg        | REMC   | d113 | Intestine    | GSM774214     | 0.296 | 53,885,997 | 53,430,571   | 174,813            |
| fIntestine_Lg        | REMC   | d91  | Intestine    | GSM774220     | 0.439 | 21,201,047 | 21,106,664   | 154,797            |
| fIntestine_Lg        | REMC   | d120 | Intestine    | GSM701531     | 0.349 | 29,832,797 | 29,469,112   | 166,626            |
| fIntestine_Lg        | REMC   | d98  | Intestine    | GSM774228     | 0.453 | 81,556,735 | 80,494,968   | 286,072            |
| fIntestine_Sm        | REMC   | d110 | Intestine    | GSM665825     | 0.412 | 36,648,756 | 36,283,133   | 182,941            |
| fIntestine_Sm        | REMC   | d115 | Intestine    | GSM701487     | 0.406 | 19,998,953 | 19,734,999   | 136,731            |
| fIntestine_Sm        | REMC   | d105 | Intestine    | GSM665835     | 0.406 | 40,799,365 | 40,095,822   | 193,223            |
| fIntestine_Sm        | REMC   | d87  | Intestine    | GSM817161     | 0.428 | 29,166,499 | 28,923,298   | 172,118            |
| fIntestine_Sm        | REMC   | d91  | Intestine    | GSM774205     | 0.476 | 22,479,708 | 22,244,548   | 173,146            |
| fIntestine_Sm        | REMC   | d107 | Intestine    | GSM774210     | 0.401 | 23,494,853 | 23,287,680   | 162,640            |
| fIntestine_Sm        | REMC   | d108 | Intestine    | GSM701496     | 0.402 | 24,154,098 | 23,959,814   | 149,240            |
| fIntestine_Sm        | REMC   | d120 | Intestine    | GSM774225     | 0.343 | 63,431,414 | 63,044,896   | 189,437            |
| fIntestine_Sm        | REMC   | d98  | Intestine    | GSM774229     | 0.417 | 35,105,452 | 34,694,378   | 183,531            |
| fKidney              | REMC   | d122 | Kidney       | GSM530655     | 0.450 | 26,390,341 | 26,243,980   | 168,058            |
| fKidney              | REMC   | d121 | Kidney       | GSM878666     | 0.380 | 24,583,989 | 24,482,089   | 185,281            |
| fKidney              | REMC   | d105 | Kidney       | GSM1027329    | 0.452 | 23,680,869 | 23,598,291   | 207,896            |
| fKidney              | REMC   | d85  | Kidney       | GSM1027342    | 0.585 | 35,548,444 | 35,467,952   | 240,229            |
| fKidney_L            | REMC   | d147 | Kidney       | GSM665822     | 0.398 | 29,828,784 | 29,783,443   | 174,558            |
| fKidney_L            | REMC   | d110 | Kidney       | GSM665829     | 0.356 | 35,168,628 | 35,102,532   | 192,878            |
| fKidney_L            | REMC   | d115 | Kidney       | GSM665834     | 0.620 | 26,541,650 | 26,356,072   | 218,057            |
| fKidney_L            | REMC   | d98  | Kidney       | GSM1027336    | 0.431 | 49,114,616 | 48,912,663   | 238,901            |
| fKidney_R            | REMC   | d117 | Kidney       | GSM665810     | 0.360 | 35,268,222 | 35,173,250   | 194,782            |
| fKidney_R            | REMC   | d107 | Kidney       | GSM817163     | 0.437 | 24,749,718 | 24,724,172   | 177,763            |
| fKidney_R            | REMC   | d87  | Kidney       | GSM1027346    | 0.519 | 27,437,943 | 27,358,757   | 204,630            |
| fKidney_renal_cortex | REMC   | d108 | Kidney       | GSM701502     | 0.540 | 25,114,272 | 25,032,574   | 202,065            |
| fKidney_renal_cortex | REMC   | d113 | Kidney       | GSM701511     | 0.583 | 29,566,179 | 29,481,922   | 241,258            |
| fKidney_renal_cortex | REMC   | d120 | Kidney       | GSM701532     | 0.440 | 29,888,464 | 29,710,664   | 204,864            |
| fKidney_renal_cortex | REMC   | d97  | Kidney       | GSM878629     | 0.536 | 19,863,251 | 19,749,761   | 180,904            |
| fKidney_renal_cortex | REMC   | d96  | Kidney       | GSM1027316    | 0.519 | 27,413,186 | 27,173,032   | 199,449            |
| fKidney_renal_cortex | REMC   | d89  | Kidney       | GSM878667     | 0.491 | 34,431,625 | 34,140,860   | 227,044            |
| fKidney_renal_pelvis | REMC   | d91  | Kidney       | GSM774222     | 0.426 | 38,430,223 | 38,227,807   | 198,240            |
| fKidney_renal_pelvis | REMC   | d127 | Kidney       | GSM817177     | 0.302 | 31,071,466 | 30,965,110   | 175,309            |
| fKidney_renal_pelvis | REMC   | d103 | Kidney       | GSM878662     | 0.438 | 51,210,201 | 50,856,330   | 247,500            |
| fLung                | REMC   | d122 | Lung         | GSM530656     | 0.470 | 25,021,977 | 24,742,635   | 157,966            |
| fLung                | REMC   | d101 | Lung         | GSM530662     | 0.670 | 24,455,569 | 24,229,966   | 220,166            |
| fLung                | REMC   | d103 | Lung         | GSM595916     | 0.400 | 41,845,529 | 41,604,307   | 196,107            |

| Cell- or tissue-type | Source | Age# | Tissue       | GEO Accession | SPOT  | Tags       | Tags (-chrM) | DHS peaks (FDR 1%) |
|----------------------|--------|------|--------------|---------------|-------|------------|--------------|--------------------|
| fLung                | REMC   | d67  | Lung         | GSM595921     | 0.416 | 20,778,962 | 20,718,549   | 166,407            |
| fLung                | REMC   | d85  | Lung         | GSM595924     | 0.662 | 24,489,273 | 24,450,572   | 205,880            |
| fLung                | REMC   | d96  | Lung         | GSM595927     | 0.554 | 17,950,380 | 17,899,596   | 158,920            |
| fLung                | REMC   | d112 | Lung         | GSM665805     | 0.471 | 36,058,035 | 35,938,309   | 199,936            |
| fLung                | REMC   | d82  | Lung         | GSM665806     | 0.401 | 37,705,535 | 37,364,344   | 175,444            |
| fLung_L              | REMC   | d110 | Lung         | GSM665828     | 0.496 | 38,447,839 | 38,319,871   | 186,870            |
| fLung_L              | REMC   | d113 | Lung         | GSM701512     | 0.505 | 39,104,651 | 38,962,497   | 187,442            |
| fLung_L              | REMC   | d108 | Lung         | GSM701524     | 0.581 | 21,555,838 | 21,499,339   | 195,089            |
| fLung_L              | REMC   | d115 | Lung         | GSM774237     | 0.663 | 89,759,962 | 89,203,598   | 233,911            |
| fLung_L              | REMC   | d87  | Lung         | GSM1027345    | 0.668 | 40,500,507 | 40,386,730   | 189,797            |
| fLung_R              | REMC   | d117 | Lung         | GSM665807     | 0.410 | 28,258,863 | 28,164,047   | 166,666            |
| fLung_R              | REMC   | d91  | Lung         | GSM774206     | 0.563 | 38,209,949 | 38,084,356   | 194,569            |
| fLung_R              | REMC   | d107 | Lung         | GSM817164     | 0.552 | 30,722,966 | 30,611,703   | 181,390            |
| fLung_R              | REMC   | d98  | Lung         | GSM774227     | 0.485 | 71,593,015 | 71,347,894   | 218,885            |
| fLung_R              | REMC   | d105 | Lung         | GSM774231     | 0.546 | 53,568,139 | 53,408,427   | 203,664            |
| fMuscle_arm          | REMC   | d115 | Muscle       | GSM701506     | 0.437 | 29,500,649 | 29,372,970   | 196,225            |
| fMuscle_arm          | REMC   | d91  | Muscle       | GSM774223     | 0.478 | 90,984,367 | 90,581,737   | 324,206            |
| fMuscle_back         | REMC   | d98  | Muscle       | GSM701536     | 0.517 | 29,018,101 | 28,803,299   | 216,313            |
| fMuscle_back         | REMC   | d105 | Muscle       | GSM774235     | 0.478 | 89,523,543 | 89,154,405   | 243,666            |
| fMuscle_back         | REMC   | d85  | Muscle       | GSM817217     | 0.500 | 31,601,635 | 31,512,300   | 207,352            |
| fMuscle_back         | REMC   | d104 | Muscle       | GSM878639     | 0.472 | 71,300,684 | 66,777,257   | 248,101            |
| fMuscle_leg          | REMC   | d127 | Muscle       | GSM774242     | 0.556 | 26,120,290 | 25,999,443   | 191,850            |
| fMuscle_leg          | REMC   | d96  | Muscle       | GSM878626     | 0.509 | 41,739,601 | 41,562,780   | 213,588            |
| fMuscle_leg          | REMC   | d97  | Muscle       | GSM817213     | 0.471 | 25,731,993 | 25,477,370   | 206,751            |
| fMuscle_leg          | REMC   | d101 | Muscle       | GSM878631     | 0.488 | 35,011,994 | 34,889,731   | 207,372            |
| fMuscle_leg          | REMC   | d113 | Muscle       | GSM878653     | 0.588 | 37,504,372 | 37,317,264   | 222,306            |
| fMuscle_trunk        | REMC   | d120 | Muscle       | GSM701533     | 0.521 | 30,627,558 | 30,400,821   | 204,765            |
| fMuscle_trunk        | REMC   | d121 | Muscle       | GSM878664     | 0.368 | 40,333,900 | 40,149,841   | 185,668            |
| fOvary               | REMC   | pool | Ovary        | GSM1027306    | 0.303 | 28,055,073 | 27,948,213   | 135,870            |
| fPlacenta            | REMC   | d108 | Placenta     | GSM774215     | 0.320 | 74,216,981 | 73,680,118   | 233,243            |
| fPlacenta            | REMC   | d91  | Placenta     | GSM774219     | 0.380 | 28,484,130 | 28,356,431   | 183,711            |
| fPlacenta            | REMC   | d85  | Placenta     | GSM817219     | 0.523 | 32,115,085 | 31,947,808   | 198,726            |
| fPlacenta            | REMC   | d113 | Placenta     | GSM878659     | 0.430 | 28,287,203 | 28,136,595   | 184,044            |
| fPlacenta            | REMC   | d105 | Placenta     | GSM1027332    | 0.566 | 41,258,148 | 40,911,915   | 213,832            |
| fRetina              | REMC   | d125 | Retina       | submitted     | 0.700 | 43,144,177 | 43,011,675   | 184,852            |
| fRetina              | REMC   | d87  | Retina       | submitted     | 0.490 | 35,442,562 | 34,942,536   | 209,105            |
| fRetina              | REMC   | d103 | Retina       | submitted     | 0.410 | 46,845,714 | 46,713,047   | 343,803            |
| fSpinal_cord         | REMC   | d105 | Spinal cord  | GSM817189     | 0.324 | 41,246,058 | 41,088,815   | 227,684            |
| fSpinal_cord         | REMC   | d96  | Spinal cord  | GSM1027308    | 0.307 | 32,060,944 | 31,943,861   | 170,412            |
| fSpinal_cord         | REMC   | d113 | Spinal cord  | GSM878661     | 0.405 | 39,555,509 | 39,344,297   | 205,017            |
| fSpinal_cord         | REMC   | d89  | Spinal cord  | GSM878663     | 0.371 | 35,237,430 | 34,879,741   | 191,578            |
| fSpinal_cord         | REMC   | d87  | Spinal cord  | GSM1027339    | 0.367 | 22,834,430 | 22,683,314   | 167,471            |
| fSpleen              | REMC   | d112 | B cell       | GSM701509     | 0.324 | 28,603,001 | 28,216,178   | 172,219            |
| fStomach             | REMC   | d147 | Stomach      | GSM774202     | 0.325 | 29,750,284 | 29,366,538   | 157,567            |
| fStomach             | REMC   | d107 | Stomach      | GSM774212     | 0.357 | 25,534,879 | 24,955,355   | 164,391            |
| fStomach             | REMC   | d91  | Stomach      | GSM701528     | 0.269 | 21,448,212 | 21,054,457   | 131,796            |
| fStomach             | REMC   | d98  | Stomach      | GSM701538     | 0.427 | 30,676,457 | 30,139,257   | 202,942            |
| fStomach             | REMC   | d105 | Stomach      | GSM774232     | 0.346 | 28,486,554 | 28,351,708   | 168,103            |
| fStomach             | REMC   | d127 | Stomach      | GSM817173     | 0.277 | 30,624,637 | 30,374,867   | 146,317            |
| fStomach             | REMC   | d101 | Stomach      | GSM817199     | 0.286 | 35,346,480 | 34,995,534   | 163,730            |
| fStomach             | REMC   | d96  | Stomach      | GSM1027318    | 0.301 | 57,000,342 | 56,662,485   | 185,823            |
| fStomach             | REMC   | d108 | Stomach      | GSM878660     | 0.368 | 30,410,923 | 30,126,473   | 177,326            |
| fStomach             | REMC   | d121 | Stomach      | GSM878665     | 0.387 | 30,430,524 | 30,060,424   | 180,573            |
| fThymus              | REMC   | d147 | T cell       | GSM665823     | 0.315 | 34,790,401 | 34,559,542   | 130,756            |
| fThymus              | REMC   | d105 | T cell       | GSM774204     | 0.343 | 28,903,878 | 28,696,303   | 116,826            |
| fThymus              | REMC   | d98  | T cell       | GSM774230     | 0.341 | 77,445,578 | 76,852,917   | 150,360            |
| fThymus              | REMC   | d127 | T cell       | GSM817172     | 0.293 | 84,341,630 | 83,920,582   | 161,208            |
| fThymus              | REMC   | d104 | T cell       | GSM1027313    | 0.336 | 41,442,960 | 41,201,419   | 129,323            |
| fThymus              | REMC   | d108 | T cell       | GSM878656     | 0.381 | 30,036,394 | 29,784,612   | 113,568            |
| fThymus              | REMC   | d113 | T cell       | GSM878657     | 0.396 | 28,428,579 | 28,166,498   | 120,968            |
| GM04503D             | ENCODE |      | Fibroblast   | GSM1024777    | 0.646 | 42,011,708 | 34,097,581   | 200,043            |
| GM04504A             | ENCODE |      | Fibroblast   | GSM1024775    | 0.751 | 35,761,055 | 31,272,576   | 190,772            |
| GM06990              | ENCODE |      | B cell       | GSM736558     | 0.546 | 22,440,189 | 19,729,256   | 92,709             |
| GM12864              | ENCODE |      | B cell       | GSM736525     | 0.475 | 29,163,780 | 22,094,200   | 137,656            |
| GM12865              | ENCODE |      | B cell       | GSM736512     | 0.525 | 37,660,121 | 34,216,112   | 143,716            |
| GM12878              | ENCODE |      | B cell       | GSM736496     | 0.500 | 26,277,477 | 22,759,410   | 117,684            |
| H7_hESC_T14          | ENCODE |      | ES           | GSM736638     | 0.372 | 33,507,208 | 26,763,822   | 140,102            |
| H7_hESC_T2           | ENCODE |      | ES           | GSM736638     | 0.286 | 24,392,212 | 24,354,266   | 156,697            |
| H7_hESC_T5           | ENCODE |      | ES           | GSM736638     | 0.343 | 44,134,819 | 42,890,856   | 211,653            |
| HAC                  | ENCODE |      | Brain        | GSM736586     | 0.422 | 45,892,152 | 40,763,545   | 180,083            |
| HAEPiC               | ENCODE |      | Placenta     | GSM736631     | 0.764 | 31,211,767 | 29,842,070   | 205,033            |
| HAh                  | ENCODE |      | Brain        | GSM736594     | 0.485 | 32,927,492 | 27,040,382   | 200,014            |
| HAsp                 | ENCODE |      | Spinal cord  | GSM736537     | 0.425 | 39,414,103 | 34,517,745   | 194,537            |
| HBMEC                | ENCODE |      | Blood vessel | GSM736509     | 0.543 | 45,157,036 | 35,967,071   | 199,815            |
| HBVP                 | ENCODE |      | Blood vessel | GSM1024750    | 0.359 | 47,747,677 | 45,100,866   | 209,369            |
| HBVSMC               | ENCODE |      | Blood vessel | GSM1024768    | 0.355 | 26,910,879 | 25,087,761   | 160,148            |
| HCFAa                | ENCODE |      | Heart        | GSM736494     | 0.518 | 32,427,458 | 29,403,643   | 184,440            |
| HCF                  | ENCODE |      | Heart        | GSM736568     | 0.688 | 35,153,888 | 27,752,878   | 174,667            |
| HCM                  | ENCODE |      | Heart        | GSM736516     | 0.721 | 38,668,400 | 30,918,209   | 193,375            |
| HConF                | ENCODE |      | Fibroblast   | GSM736547     | 0.506 | 36,022,255 | 32,701,475   | 153,668            |
| HCPEpiC              | ENCODE |      | Brain        | GSM736569     | 0.742 | 26,199,536 | 24,538,293   | 210,380            |
| HCT116               | ENCODE |      | Intestine    | GSM736600     | 0.454 | 39,022,377 | 26,710,185   | 114,060            |
| HEEPiC               | ENCODE |      | Esophagael   | GSM736585     | 0.569 | 39,750,750 | 31,034,571   | 209,838            |
| Hela                 | ENCODE |      | Cervical     | GSM736564     | 0.579 | 36,519,330 | 26,208,222   | 123,470            |
| HEPG2                | ENCODE |      | Liver        | GSM736637     | 0.570 | 22,126,494 | 18,183,774   | 90,775             |
| HESC                 | ENCODE |      | ES           | GSM736582     | 0.358 | 24,431,583 | 20,890,242   | 150,729            |
| hESCT0               | ENCODE |      | ES           | GSM736638     | 0.635 | 33,752,751 | 27,784,900   | 266,618            |
| HFF                  | ENCODE |      | Fibroblast   | GSM736602     | 0.545 | 46,526,167 | 37,514,733   | 192,282            |
| HFF_MyC              | ENCODE |      | Fibroblast   | GSM736524     | 0.484 | 39,972,176 | 29,812,887   | 209,807            |

| Cell- or tissue-type | Source | Age# | Tissue       | GEO Accession | SPOT  | Tags       | Tags (-chrM) | DHS peaks (FDR 1%) |
|----------------------|--------|------|--------------|---------------|-------|------------|--------------|--------------------|
| HGF                  | ENCODE |      | Fibroblast   | GSM736579     | 0.483 | 30,751,179 | 30,148,924   | 145,887            |
| HIPEpiC              | ENCODE |      | Iris         | GSM736589     | 0.560 | 32,033,391 | 26,191,760   | 225,744            |
| HL60                 | ENCODE |      | Myeloid      | GSM736626     | 0.589 | 33,148,093 | 32,066,521   | 161,716            |
| HMEC                 | ENCODE |      | Mammary      | GSM736634     | 0.425 | 43,782,139 | 31,914,218   | 140,574            |
| HMF                  | ENCODE |      | Fibroblast   | GSM736628     | 0.798 | 33,118,548 | 27,188,138   | 179,452            |
| HMVEC_dAd            | ENCODE |      | Blood vessel | GSM1024745    | 0.377 | 28,492,574 | 25,367,629   | 125,234            |
| HMVEC_dBIAd          | ENCODE |      | Blood vessel | GSM736609     | 0.726 | 46,050,351 | 42,643,211   | 162,593            |
| HMVEC_dBINeo         | ENCODE |      | Blood vessel | GSM736571     | 0.529 | 54,866,074 | 49,657,528   | 168,436            |
| HMVEC_dLyAd          | ENCODE |      | Blood vessel | GSM736599     | 0.575 | 48,098,604 | 33,370,795   | 127,713            |
| HMVEC_dLyNeo         | ENCODE |      | Blood vessel | GSM736577     | 0.578 | 44,427,289 | 41,368,217   | 153,107            |
| HMVEC_dNeo           | ENCODE |      | Blood vessel | GSM736611     | 0.586 | 41,076,964 | 29,813,741   | 141,037            |
| HMVEC_LBI            | ENCODE |      | Blood vessel | GSM736542     | 0.485 | 50,131,824 | 47,911,926   | 169,983            |
| HMVEC_LLy            | ENCODE |      | Blood vessel | GSM736507     | 0.605 | 52,381,779 | 41,515,731   | 144,886            |
| HNPCEpiC             | ENCODE |      | Blood vessel | GSM736621     | 0.605 | 30,449,370 | 20,884,189   | 212,433            |
| HPAEC                | ENCODE |      | Blood vessel | GSM1024763    | 0.298 | 33,475,651 | 32,804,748   | 123,918            |
| HPAF                 | ENCODE |      | Blood vessel | GSM736555     | 0.716 | 54,924,185 | 47,644,186   | 188,071            |
| HPdLF                | ENCODE |      | Fibroblast   | GSM736632     | 0.686 | 25,814,740 | 23,004,769   | 171,349            |
| HPF                  | ENCODE |      | Lung         | GSM736574     | 0.672 | 30,693,222 | 27,902,228   | 154,397            |
| HRCE                 | ENCODE |      | Kidney       | GSM736549     | 0.657 | 26,420,059 | 24,358,945   | 192,147            |
| HRE                  | ENCODE |      | Kidney       | GSM736527     | 0.534 | 25,850,984 | 22,900,558   | 187,131            |
| HRGEC                | ENCODE |      | Kidney       | GSM736499     | 0.424 | 20,987,760 | 19,623,147   | 141,865            |
| HRPEpiC              | ENCODE |      | Retina       | GSM736630     | 0.741 | 38,479,119 | 27,376,806   | 227,086            |
| HSMM_D               | ENCODE |      | Muscle       | GSM736530     | 0.498 | 34,007,549 | 28,658,027   | 221,749            |
| HSMM                 | ENCODE |      | Muscle       | GSM736560     | 0.637 | 44,844,225 | 37,479,300   | 228,282            |
| hTH17                | ENCODE |      | T cell       | GSM1024790    | 0.268 | 18,274,006 | 17,865,182   | 77,514             |
| hTH1                 | ENCODE |      | T cell       | GSM1024753    | 0.333 | 20,742,528 | 20,459,985   | 82,245             |
| hTH2                 | ENCODE |      | T cell       | GSM1024739    | 0.689 | 43,122,486 | 42,711,501   | 128,977            |
| hTR                  | ENCODE |      | T cell       | GSM1024744    | 0.504 | 40,015,882 | 37,326,516   | 125,848            |
| HUVEC                | ENCODE |      | Blood vessel | GSM736575     | 0.401 | 23,090,713 | 20,957,203   | 119,094            |
| HVMF                 | ENCODE |      | Connective   | GSM736534     | 0.591 | 22,052,455 | 19,811,379   | 170,340            |
| Jurkat               | ENCODE |      | T cell       | GSM736501     | 0.497 | 67,808,791 | 62,773,068   | 159,613            |
| K562                 | ENCODE |      | Erythroid    | GSM736629     | 0.542 | 35,811,565 | 22,416,086   | 142,986            |
| LHCN_M2_D4           | ENCODE |      | Muscle       | GSM1024787    | 0.727 | 64,634,390 | 37,759,025   | 218,246            |
| LHCN_M2              | ENCODE |      | Muscle       | GSM1024787    | 0.709 | 37,903,192 | 30,643,938   | 192,347            |
| LNcap                | ENCODE |      | Prostate     | GSM736565     | 0.620 | 49,624,105 | 28,747,933   | 183,224            |
| M059J                | ENCODE |      | Brain        | GSM1024773    | 0.690 | 61,673,188 | 56,087,660   | 220,835            |
| MCF7                 | ENCODE |      | Mammary      | GSM736581     | 0.683 | 44,891,456 | 32,444,710   | 207,878            |
| MCF7                 | ENCODE |      | Mammary      | GSM736581     | 0.437 | 29,211,804 | 22,787,939   | 126,717            |
| MCF7_ER              | ENCODE |      | Mammary      | GSM736581     | 0.652 | 63,497,188 | 45,615,312   | 220,065            |
| NB4                  | ENCODE |      | Myeloid      | GSM736604     | 0.531 | 36,021,761 | 32,684,492   | 143,838            |
| NHA                  | ENCODE |      | Brain        | GSM736544     | 0.562 | 40,038,155 | 34,637,438   | 191,510            |
| NHBE_RA              | ENCODE |      | Broncheal    | GSM1024781    | 0.344 | 41,688,982 | 29,967,781   | 149,972            |
| NHDF_Ad              | ENCODE |      | Fibroblast   | GSM736567     | 0.805 | 44,829,222 | 44,170,209   | 230,696            |
| NHDF_Neo             | ENCODE |      | Fibroblast   | GSM736498     | 0.698 | 38,935,890 | 33,799,898   | 187,962            |
| NHEK                 | ENCODE |      | Skin         | GSM736545     | 0.357 | 27,995,767 | 24,307,712   | 145,203            |
| NHLF                 | ENCODE |      | Lung         | GSM736612     | 0.706 | 41,241,537 | 33,520,502   | 206,254            |
| NT2_D1               | ENCODE |      | ES           | GSM1024751    | 0.351 | 36,885,055 | 33,804,957   | 184,238            |
| PANC1                | ENCODE |      | Pancreas     | GSM736517     | 0.418 | 26,460,252 | 22,683,675   | 116,642            |
| PrEC                 | ENCODE |      | Prostate     | GSM1024742    | 0.323 | 35,291,903 | 32,675,776   | 167,623            |
| RPMI_7951            | ENCODE |      | Skin         | GSM1024779    | 0.682 | 38,648,543 | 34,251,134   | 167,310            |
| RPTEC                | ENCODE |      | Kidney       | GSM736543     | 0.487 | 35,166,095 | 22,996,745   | 169,261            |
| SAEC                 | ENCODE |      | Broncheal    | GSM736608     | 0.620 | 24,221,968 | 22,257,395   | 198,442            |
| SKMC                 | ENCODE |      | Muscle       | GSM736593     | 0.801 | 28,517,820 | 28,117,588   | 205,493            |
| SK_N_MC              | ENCODE |      | Brain        | GSM736522     | 0.353 | 26,552,446 | 24,428,899   | 146,328            |
| SKNSH                | ENCODE |      | Brain        | GSM736559     | 0.622 | 19,593,615 | 18,614,810   | 89,968             |
| T_47D                | ENCODE |      | Mammary      | GSM1024762    | 0.584 | 55,382,458 | 41,173,122   | 153,537            |
| WERI_Rb1             | ENCODE |      | Retina       | GSM736495     | 0.546 | 35,473,957 | 33,340,703   | 191,374            |
| WI_38                | ENCODE |      | Lung         | GSM736613     | 0.700 | 26,765,352 | 20,405,387   | 166,381            |
| WI_38_TAM            | ENCODE |      | Lung         | GSM736613     | 0.622 | 28,554,163 | 24,833,322   | 205,334            |

Total distinct peaks

3,022,372

# y = years post-natal, d = days post-conception, blank = primary, cultured or malignant cells

**Table S3**

| Cell- or tissue-type                | Age*  | Not aligned |         | Not DHS in human |         | DHS in human |         | Total#  |
|-------------------------------------|-------|-------------|---------|------------------|---------|--------------|---------|---------|
|                                     |       | # peaks     | % peaks | # peaks          | % peaks | # peaks      | % peaks |         |
| E14                                 | E0    | 80,583      | 45.5%   | 26,273           | 14.8%   | 70,120       | 39.6%   | 176,976 |
| CJ7                                 | E0    | 75,270      | 47.4%   | 22,106           | 13.9%   | 61,331       | 38.6%   | 158,707 |
| ZhBTc4                              | E0    | 77,919      | 45.8%   | 25,009           | 14.7%   | 67,164       | 39.5%   | 170,092 |
| ESC (F4WT)                          | E0    | 82,365      | 46.1%   | 26,526           | 14.8%   | 69,807       | 39.1%   | 178,698 |
| 416b                                | I     | 58,933      | 42.7%   | 22,653           | 16.4%   | 56,363       | 40.9%   | 137,949 |
| MEL                                 | I     | 60,654      | 45.3%   | 21,290           | 15.9%   | 52,055       | 38.8%   | 133,999 |
| Erythroblast (CD117+;CD71-;Ter119-) | E14.5 | 61,617      | 38.3%   | 24,796           | 15.4%   | 74,311       | 46.2%   | 160,724 |
| Erythroblast (CD117+;CD71+;Ter119-) | E14.5 | 52,228      | 41.9%   | 18,410           | 14.8%   | 53,914       | 43.3%   | 124,552 |
| Erythroblast (CD117-;CD71+;Ter119+) | E14.5 | 29,920      | 40.2%   | 10,006           | 13.5%   | 34,460       | 46.3%   | 74,386  |
| Erythroblast (CD117+;CD71+;Ter119+) | E14.5 | 42,430      | 40.7%   | 14,691           | 14.1%   | 47,232       | 45.3%   | 104,353 |
| Naive T cell (activated)            | W8    | 34,496      | 37.2%   | 12,749           | 13.7%   | 45,558       | 49.1%   | 92,803  |
| Regulatory T cell (activated)       | W8    | 41,758      | 39.4%   | 15,106           | 14.2%   | 49,249       | 46.4%   | 106,113 |
| Naive T cell (resting)              | W8    | 40,697      | 39.7%   | 15,604           | 15.2%   | 46,262       | 45.1%   | 102,563 |
| Regulatory T cell (resting)         | W8    | 38,518      | 38.2%   | 13,688           | 13.6%   | 48,598       | 48.2%   | 100,804 |
| B cell (CD19+)                      | W8    | 38,256      | 37.9%   | 14,083           | 13.9%   | 48,643       | 48.2%   | 100,982 |
| B cell (CD53+)                      | W8    | 38,280      | 39.2%   | 13,590           | 13.9%   | 45,769       | 46.9%   | 97,639  |
| Liver                               | E14.5 | 41,251      | 38.3%   | 15,036           | 13.9%   | 51,537       | 47.8%   | 107,824 |
| Liver                               | E14.5 | 41,073      | 38.2%   | 14,842           | 13.8%   | 51,734       | 48.1%   | 107,649 |
| Liver                               | W8    | 42,346      | 37.9%   | 20,548           | 18.4%   | 48,890       | 43.7%   | 111,784 |
| A20 (lymphoma)                      | I     | 54,396      | 42.6%   | 20,896           | 16.4%   | 52,336       | 41.0%   | 127,628 |
| Mammary adenocarcinoma              | I     | 29,491      | 32.4%   | 11,840           | 13.0%   | 49,635       | 54.6%   | 90,966  |
| Whole brain                         | E18.5 | 39,091      | 21.9%   | 31,667           | 17.8%   | 107,361      | 60.3%   | 178,119 |
| Whole brain                         | W8    | 62,899      | 28.8%   | 43,684           | 20.0%   | 112,014      | 51.2%   | 218,597 |
| Cerebrum                            | W8    | 60,346      | 28.2%   | 48,480           | 22.7%   | 105,164      | 49.1%   | 213,990 |
| Cerebellum                          | W8    | 32,608      | 28.5%   | 18,803           | 16.4%   | 62,965       | 55.1%   | 114,376 |
| Lung                                | W8    | 59,285      | 33.4%   | 32,120           | 18.1%   | 85,947       | 48.5%   | 177,352 |
| Kidney                              | W8    | 59,542      | 34.8%   | 30,698           | 17.9%   | 80,980       | 47.3%   | 171,220 |
| Fat pad (mammary)                   | W8    | 55,297      | 36.5%   | 28,524           | 18.8%   | 67,563       | 44.6%   | 151,384 |
| Fibroblast (tail)                   | I     | 52,603      | 31.2%   | 29,090           | 17.3%   | 86,887       | 51.5%   | 168,580 |
| Fibroblast (NIH3T3)                 | I     | 47,016      | 33.8%   | 21,600           | 15.5%   | 70,671       | 50.7%   | 139,287 |
| Fibroblast (embryonic kidney)       | I     | 47,897      | 32.4%   | 26,985           | 18.2%   | 73,010       | 49.4%   | 147,892 |
| Heart                               | W8    | 45,619      | 29.5%   | 24,139           | 15.6%   | 85,013       | 54.9%   | 154,771 |
| Embryo (headless)                   | E11.5 | 40,219      | 26.4%   | 21,259           | 13.9%   | 90,981       | 59.7%   | 152,459 |
| Embryo (forelimb buds)              | E11.5 | 45,168      | 28.1%   | 24,222           | 15.1%   | 91,401       | 56.8%   | 160,791 |
| Fat pad (genital)                   | W8    | 67,057      | 37.1%   | 35,318           | 19.6%   | 78,197       | 43.3%   | 180,572 |
| Embryo (hindlimb buds)              | E11.5 | 44,267      | 28.1%   | 24,695           | 15.7%   | 88,798       | 56.3%   | 157,760 |
| Embryo (mesoderm)                   | E11.5 | 43,181      | 26.6%   | 24,325           | 15.0%   | 94,953       | 58.4%   | 162,459 |
| Intestine (large)                   | W8    | 53,391      | 38.6%   | 23,019           | 16.6%   | 62,061       | 44.8%   | 138,471 |
| Muscle (skeletal)                   | W8    | 41,230      | 29.5%   | 20,894           | 15.0%   | 77,526       | 55.5%   | 139,650 |
| Retina                              | W8    | 30,844      | 29.0%   | 14,902           | 14.0%   | 60,469       | 56.9%   | 106,215 |
| Retina                              | D7    | 33,666      | 28.3%   | 15,969           | 13.4%   | 69,356       | 58.3%   | 118,991 |
| Retina                              | D0    | 36,126      | 26.9%   | 19,810           | 14.7%   | 78,419       | 58.4%   | 134,355 |
| Spleen                              | W8    | 36,278      | 38.1%   | 13,352           | 14.0%   | 45,499       | 47.8%   | 95,129  |
| Thymus                              | W8    | 44,140      | 38.9%   | 16,902           | 14.9%   | 52,478       | 46.2%   | 113,520 |
| CH12 (lymphoma)                     | I     | 63,397      | 42.1%   | 26,139           | 17.3%   | 61,138       | 40.6%   | 150,674 |

\* E = days post-conception, D = days post-natal, W = weeks post-natal, I = immortalized or malignant

# Total peaks from master peaks list (see Supporting Methods)

**Table S4**

| Cell- or tissue-type | Age* | Not aligned |         | Not DHS in mouse |         | DHS in mouse |         | Total#  |
|----------------------|------|-------------|---------|------------------|---------|--------------|---------|---------|
|                      |      | # peaks     | % peaks | # peaks          | % peaks | # peaks      | % peaks |         |
| A549                 |      | 56,327      | 38.8%   | 36,445           | 25.1%   | 52,537       | 36.2%   | 145,309 |
| AG04449              |      | 73,878      | 36.6%   | 58,713           | 29.1%   | 69,302       | 34.3%   | 201,893 |
| AG04450              |      | 65,008      | 35.8%   | 49,633           | 27.3%   | 67,180       | 36.9%   | 181,821 |
| AG09309              |      | 89,264      | 36.9%   | 70,819           | 29.3%   | 81,928       | 33.9%   | 242,011 |
| AG09319              |      | 58,682      | 33.7%   | 47,490           | 27.3%   | 67,822       | 39.0%   | 173,994 |
| AG10803              |      | 73,912      | 35.6%   | 58,341           | 28.1%   | 75,129       | 36.2%   | 207,382 |
| AoAF                 |      | 75,624      | 35.7%   | 58,858           | 27.8%   | 77,085       | 36.4%   | 211,567 |
| BE2_C                |      | 76,347      | 36.9%   | 58,379           | 28.2%   | 72,261       | 34.9%   | 206,987 |
| BJ                   |      | 70,919      | 35.8%   | 58,337           | 29.4%   | 69,043       | 34.8%   | 198,299 |
| CACO2                |      | 52,579      | 35.6%   | 41,067           | 27.8%   | 54,211       | 36.7%   | 147,857 |
| CD14                 |      | 86,352      | 43.0%   | 53,618           | 26.7%   | 61,053       | 30.4%   | 201,023 |
| CD19                 | y34  | 37,781      | 35.9%   | 23,176           | 22.0%   | 44,230       | 42.0%   | 105,187 |
| CD20                 |      | 44,868      | 36.0%   | 27,592           | 22.1%   | 52,157       | 41.9%   | 124,617 |
| CD34                 | y33  | 64,748      | 38.5%   | 41,169           | 24.5%   | 62,410       | 37.1%   | 168,327 |
| CD34                 |      | 75,036      | 38.6%   | 47,615           | 24.5%   | 71,881       | 37.0%   | 194,532 |
| CD4                  | y37  | 40,534      | 35.3%   | 24,588           | 21.4%   | 49,685       | 43.3%   | 114,807 |
| CD4pos_N             |      | 35,699      | 36.3%   | 22,677           | 23.0%   | 40,083       | 40.7%   | 98,459  |
| CMK                  |      | 66,174      | 41.8%   | 38,850           | 24.5%   | 53,261       | 33.6%   | 158,285 |
| fAdrenal             | d96  | 81,661      | 35.9%   | 64,442           | 28.3%   | 81,421       | 35.8%   | 227,524 |
| fAdrenal             | d85  | 77,024      | 34.2%   | 63,716           | 28.3%   | 84,713       | 37.6%   | 225,453 |
| fAdrenal             | d108 | 58,885      | 35.9%   | 43,321           | 26.4%   | 61,722       | 37.7%   | 163,928 |
| fAdrenal             | d101 | 76,831      | 35.4%   | 60,523           | 27.9%   | 79,806       | 36.7%   | 217,160 |
| fAdrenal             | d113 | 86,410      | 36.5%   | 69,264           | 29.2%   | 81,146       | 34.3%   | 236,820 |
| fBrain               | d122 | 65,968      | 30.6%   | 64,895           | 30.1%   | 84,531       | 39.2%   | 215,394 |
| fBrain               | d117 | 70,308      | 30.1%   | 71,318           | 30.6%   | 91,777       | 39.3%   | 233,403 |
| fBrain               | d85  | 63,723      | 28.1%   | 67,364           | 29.7%   | 95,625       | 42.2%   | 226,712 |
| fBrain               | d96  | 64,562      | 30.4%   | 62,892           | 29.6%   | 84,916       | 40.0%   | 212,370 |
| fBrain               | d112 | 68,107      | 29.1%   | 75,146           | 32.1%   | 90,532       | 38.7%   | 233,785 |
| fBrain               | d142 | 57,884      | 28.4%   | 63,803           | 31.3%   | 82,264       | 40.3%   | 203,951 |
| fBrain               | d101 | 74,876      | 29.0%   | 79,855           | 30.9%   | 103,390      | 40.1%   | 258,121 |
| fBrain               | d104 | 68,753      | 30.4%   | 66,989           | 29.6%   | 90,316       | 40.0%   | 226,058 |
| fBrain               | d109 | 61,976      | 29.2%   | 63,351           | 29.8%   | 87,251       | 41.0%   | 212,578 |
| fBrain               | d105 | 73,427      | 30.1%   | 73,343           | 30.1%   | 97,025       | 39.8%   | 243,795 |
| fHeart               | d96  | 70,589      | 33.0%   | 59,591           | 27.9%   | 83,492       | 39.1%   | 213,672 |
| fHeart               | d101 | 87,103      | 33.9%   | 75,635           | 29.4%   | 94,348       | 36.7%   | 257,086 |
| fHeart               | d117 | 63,750      | 32.2%   | 56,484           | 28.6%   | 77,564       | 39.2%   | 197,798 |
| fHeart               | d103 | 71,673      | 33.1%   | 65,427           | 30.2%   | 79,361       | 36.7%   | 216,461 |
| fHeart               | d147 | 77,034      | 33.2%   | 73,569           | 31.7%   | 81,337       | 35.1%   | 231,940 |
| fHeart               | d110 | 78,676      | 33.5%   | 67,543           | 28.8%   | 88,482       | 37.7%   | 234,701 |
| fHeart               | d105 | 90,590      | 34.2%   | 75,571           | 28.5%   | 98,821       | 37.3%   | 264,982 |
| fHeart               | d120 | 88,246      | 33.4%   | 77,863           | 29.5%   | 98,246       | 37.2%   | 264,355 |
| fHeart               | d91  | 83,176      | 33.7%   | 70,734           | 28.7%   | 92,972       | 37.7%   | 246,882 |
| fIntestine_Lg        | d103 | 61,072      | 32.2%   | 48,760           | 25.7%   | 79,643       | 42.0%   | 189,475 |
| fIntestine_Lg        | d105 | 75,869      | 36.6%   | 54,478           | 26.3%   | 76,969       | 37.1%   | 207,316 |
| fIntestine_Lg        | d110 | 79,221      | 36.2%   | 59,820           | 27.3%   | 79,759       | 36.5%   | 218,800 |
| fIntestine_Lg        | d107 | 74,910      | 36.3%   | 56,451           | 27.3%   | 75,225       | 36.4%   | 206,586 |
| fIntestine_Lg        | d108 | 37,563      | 34.6%   | 27,122           | 25.0%   | 43,890       | 40.4%   | 108,575 |
| fIntestine_Lg        | d115 | 62,644      | 34.0%   | 46,380           | 25.2%   | 75,358       | 40.9%   | 184,382 |
| fIntestine_Lg        | d113 | 79,272      | 37.3%   | 57,025           | 26.8%   | 76,378       | 35.9%   | 212,675 |
| fIntestine_Lg        | d91  | 67,186      | 35.1%   | 48,357           | 25.3%   | 75,831       | 39.6%   | 191,374 |
| fIntestine_Lg        | d120 | 76,130      | 37.0%   | 55,063           | 26.8%   | 74,358       | 36.2%   | 205,551 |
| fIntestine_Lg        | d98  | 134,881     | 39.7%   | 98,046           | 28.8%   | 107,213      | 31.5%   | 340,140 |
| fIntestine_Sm        | d110 | 83,624      | 36.4%   | 63,576           | 27.6%   | 82,777       | 36.0%   | 229,977 |
| fIntestine_Sm        | d115 | 60,130      | 35.3%   | 41,929           | 24.6%   | 68,262       | 40.1%   | 170,321 |
| fIntestine_Sm        | d105 | 88,488      | 37.0%   | 66,555           | 27.9%   | 83,810       | 35.1%   | 238,853 |
| fIntestine_Sm        | d87  | 74,051      | 34.9%   | 54,681           | 25.8%   | 83,166       | 39.2%   | 211,898 |
| fIntestine_Sm        | d91  | 76,506      | 35.9%   | 55,677           | 26.1%   | 81,038       | 38.0%   | 213,221 |
| fIntestine_Sm        | d107 | 69,329      | 34.4%   | 51,749           | 25.7%   | 80,171       | 39.8%   | 201,249 |
| fIntestine_Sm        | d108 | 69,186      | 36.9%   | 49,896           | 26.6%   | 68,172       | 36.4%   | 187,254 |
| fIntestine_Sm        | d120 | 84,929      | 36.7%   | 61,618           | 26.6%   | 84,730       | 36.6%   | 231,277 |
| fIntestine_Sm        | d98  | 82,490      | 36.4%   | 59,834           | 26.4%   | 84,068       | 37.1%   | 226,392 |
| fKidney              | d122 | 67,815      | 31.8%   | 55,748           | 26.1%   | 89,780       | 42.1%   | 213,343 |
| fKidney              | d121 | 72,854      | 31.3%   | 65,120           | 28.0%   | 94,674       | 40.7%   | 232,648 |
| fKidney              | d105 | 84,763      | 32.6%   | 74,115           | 28.5%   | 100,989      | 38.9%   | 259,867 |
| fKidney              | d85  | 103,037     | 34.9%   | 83,422           | 28.3%   | 108,643      | 36.8%   | 295,102 |
| fKidney_L            | d147 | 69,030      | 30.8%   | 65,513           | 29.2%   | 89,463       | 39.9%   | 224,006 |
| fKidney_L            | d110 | 78,574      | 31.9%   | 74,341           | 30.2%   | 93,040       | 37.8%   | 245,955 |
| fKidney_L            | d115 | 91,843      | 33.5%   | 75,945           | 27.7%   | 106,496      | 38.8%   | 274,284 |
| fKidney_L            | d98  | 99,602      | 33.8%   | 86,395           | 29.3%   | 108,716      | 36.9%   | 294,713 |

| Cell- or tissue-type | Age* | Not aligned |         | Not DHS in mouse |         | DHS in mouse |         | Total#  |
|----------------------|------|-------------|---------|------------------|---------|--------------|---------|---------|
|                      |      | # peaks     | % peaks | # peaks          | % peaks | # peaks      | % peaks |         |
| fKidney_R            | d117 | 80,948      | 32.3%   | 73,424           | 29.3%   | 96,164       | 38.4%   | 250,536 |
| fKidney_R            | d107 | 69,926      | 31.4%   | 60,148           | 27.0%   | 92,751       | 41.6%   | 222,825 |
| fKidney_R            | d87  | 84,389      | 33.0%   | 70,543           | 27.6%   | 100,749      | 39.4%   | 255,681 |
| fKidney_renal_cortex | d108 | 82,569      | 32.3%   | 72,489           | 28.3%   | 100,743      | 39.4%   | 255,801 |
| fKidney_renal_cortex | d113 | 102,935     | 34.1%   | 87,225           | 28.9%   | 111,276      | 36.9%   | 301,436 |
| fKidney_renal_cortex | d120 | 84,310      | 32.5%   | 73,978           | 28.5%   | 100,858      | 38.9%   | 259,146 |
| fKidney_renal_cortex | d97  | 71,790      | 31.6%   | 60,590           | 26.7%   | 94,514       | 41.7%   | 226,894 |
| fKidney_renal_cortex | d96  | 80,546      | 32.3%   | 68,368           | 27.4%   | 100,344      | 40.3%   | 249,258 |
| fKidney_renal_cortex | d89  | 94,585      | 33.5%   | 81,256           | 28.8%   | 106,134      | 37.6%   | 281,975 |
| fKidney_renal_pelvis | d91  | 82,257      | 33.3%   | 66,083           | 26.8%   | 98,685       | 39.9%   | 247,025 |
| fKidney_renal_pelvis | d127 | 69,085      | 31.2%   | 61,380           | 27.7%   | 91,090       | 41.1%   | 221,555 |
| fKidney_renal_pelvis | d103 | 103,589     | 34.0%   | 89,644           | 29.5%   | 111,127      | 36.5%   | 304,360 |
| fLung                | d122 | 63,460      | 32.0%   | 53,397           | 26.9%   | 81,302       | 41.0%   | 198,159 |
| fLung                | d101 | 94,196      | 34.5%   | 81,299           | 29.8%   | 97,612       | 35.7%   | 273,107 |
| fLung                | d103 | 82,352      | 33.5%   | 75,419           | 30.7%   | 88,087       | 35.8%   | 245,858 |
| fLung                | d67  | 68,319      | 32.5%   | 57,978           | 27.6%   | 83,720       | 39.9%   | 210,017 |
| fLung                | d85  | 85,272      | 33.2%   | 76,009           | 29.6%   | 95,765       | 37.3%   | 257,046 |
| fLung                | d96  | 62,810      | 31.4%   | 56,107           | 28.1%   | 80,912       | 40.5%   | 199,829 |
| fLung                | d112 | 83,034      | 33.2%   | 76,799           | 30.7%   | 90,608       | 36.2%   | 250,441 |
| fLung                | d82  | 71,530      | 32.3%   | 67,830           | 30.6%   | 82,387       | 37.2%   | 221,747 |
| fLung_L              | d110 | 77,121      | 32.6%   | 70,644           | 29.9%   | 88,642       | 37.5%   | 236,407 |
| fLung_L              | d113 | 77,822      | 32.7%   | 68,552           | 28.8%   | 91,683       | 38.5%   | 238,057 |
| fLung_L              | d108 | 79,252      | 32.6%   | 71,016           | 29.2%   | 92,935       | 38.2%   | 243,203 |
| fLung_L              | d115 | 97,920      | 34.5%   | 81,141           | 28.6%   | 104,725      | 36.9%   | 283,786 |
| fLung_L              | d87  | 76,916      | 33.1%   | 67,133           | 28.9%   | 88,630       | 38.1%   | 232,679 |
| fLung_R              | d117 | 66,759      | 31.5%   | 61,657           | 29.1%   | 83,796       | 39.5%   | 212,212 |
| fLung_R              | d91  | 78,225      | 32.6%   | 68,454           | 28.5%   | 93,602       | 39.0%   | 240,281 |
| fLung_R              | d107 | 71,058      | 31.6%   | 64,334           | 28.6%   | 89,454       | 39.8%   | 224,846 |
| fLung_R              | d98  | 91,338      | 33.8%   | 79,063           | 29.2%   | 100,088      | 37.0%   | 270,489 |
| fLung_R              | d105 | 82,470      | 32.8%   | 72,146           | 28.7%   | 96,787       | 38.5%   | 251,403 |
| fMuscle_arm          | d115 | 76,837      | 31.4%   | 75,098           | 30.6%   | 93,131       | 38.0%   | 245,066 |
| fMuscle_arm          | d91  | 140,585     | 36.8%   | 120,026          | 31.4%   | 121,621      | 31.8%   | 382,232 |
| fMuscle_back         | d98  | 85,784      | 31.9%   | 79,664           | 29.6%   | 103,328      | 38.4%   | 268,776 |
| fMuscle_back         | d105 | 97,212      | 32.8%   | 88,002           | 29.7%   | 110,872      | 37.4%   | 296,086 |
| fMuscle_back         | d85  | 80,229      | 31.6%   | 75,674           | 29.8%   | 97,798       | 38.5%   | 253,701 |
| fMuscle_back         | d104 | 103,912     | 34.6%   | 90,807           | 30.3%   | 105,186      | 35.1%   | 299,905 |
| fMuscle_leg          | d127 | 73,330      | 31.0%   | 67,296           | 28.4%   | 95,923       | 40.6%   | 236,549 |
| fMuscle_leg          | d96  | 82,734      | 31.8%   | 78,408           | 30.1%   | 99,001       | 38.1%   | 260,143 |
| fMuscle_leg          | d97  | 79,719      | 31.4%   | 76,368           | 30.1%   | 97,614       | 38.5%   | 253,701 |
| fMuscle_leg          | d101 | 80,365      | 31.6%   | 74,766           | 29.4%   | 98,995       | 39.0%   | 254,126 |
| fMuscle_leg          | d113 | 87,071      | 32.2%   | 81,261           | 30.0%   | 102,386      | 37.8%   | 270,718 |
| fMuscle_trunk        | d120 | 81,120      | 31.9%   | 74,126           | 29.2%   | 98,762       | 38.9%   | 254,008 |
| fMuscle_trunk        | d121 | 70,422      | 30.8%   | 65,285           | 28.6%   | 92,650       | 40.6%   | 228,357 |
| fOvary               | pool | 54,725      | 32.8%   | 40,692           | 24.4%   | 71,443       | 42.8%   | 166,860 |
| fPlacenta            | d108 | 116,138     | 42.4%   | 73,834           | 27.0%   | 83,665       | 30.6%   | 273,637 |
| fPlacenta            | d91  | 90,994      | 41.8%   | 55,110           | 25.3%   | 71,338       | 32.8%   | 217,442 |
| fPlacenta            | d85  | 101,630     | 44.2%   | 60,218           | 26.2%   | 68,195       | 29.6%   | 230,043 |
| fPlacenta            | d113 | 91,694      | 42.6%   | 55,904           | 26.0%   | 67,825       | 31.5%   | 215,423 |
| fPlacenta            | d105 | 109,086     | 44.4%   | 65,882           | 26.8%   | 70,684       | 28.8%   | 245,652 |
| fRetina              | d125 | 72,230      | 32.2%   | 62,616           | 27.9%   | 89,552       | 39.9%   | 224,398 |
| fRetina              | d87  | 78,004      | 30.6%   | 73,024           | 28.6%   | 104,094      | 40.8%   | 255,122 |
| fRetina              | d103 | 127,649     | 32.1%   | 140,437          | 35.4%   | 129,095      | 32.5%   | 397,181 |
| fSpinal_cord         | d105 | 77,694      | 27.9%   | 91,064           | 32.7%   | 109,827      | 39.4%   | 278,585 |
| fSpinal_cord         | d96  | 56,804      | 26.8%   | 60,443           | 28.6%   | 94,399       | 44.6%   | 211,646 |
| fSpinal_cord         | d113 | 72,777      | 29.0%   | 71,650           | 28.5%   | 106,887      | 42.5%   | 251,314 |
| fSpinal_cord         | d89  | 63,565      | 27.1%   | 69,648           | 29.7%   | 101,447      | 43.2%   | 234,660 |
| fSpinal_cord         | d87  | 53,882      | 26.2%   | 60,496           | 29.4%   | 91,642       | 44.5%   | 206,020 |
| fSpleen              | d112 | 75,576      | 35.2%   | 57,468           | 26.7%   | 81,904       | 38.1%   | 214,948 |
| fStomach             | d147 | 61,626      | 31.3%   | 49,890           | 25.3%   | 85,604       | 43.4%   | 197,120 |
| fStomach             | d107 | 65,459      | 31.6%   | 52,623           | 25.4%   | 89,089       | 43.0%   | 207,171 |
| fStomach             | d91  | 52,436      | 31.0%   | 41,716           | 24.7%   | 74,922       | 44.3%   | 169,074 |
| fStomach             | d98  | 83,927      | 32.7%   | 68,202           | 26.6%   | 104,575      | 40.7%   | 256,704 |
| fStomach             | d105 | 65,861      | 31.4%   | 54,465           | 26.0%   | 89,306       | 42.6%   | 209,632 |
| fStomach             | d127 | 59,019      | 32.1%   | 44,425           | 24.2%   | 80,389       | 43.7%   | 183,833 |
| fStomach             | d101 | 64,719      | 31.5%   | 53,793           | 26.2%   | 87,116       | 42.4%   | 205,628 |
| fStomach             | d96  | 74,012      | 31.9%   | 61,046           | 26.3%   | 96,665       | 41.7%   | 231,723 |
| fStomach             | d108 | 69,215      | 31.2%   | 58,683           | 26.4%   | 94,240       | 42.4%   | 222,138 |
| fStomach             | d121 | 73,677      | 32.7%   | 58,625           | 26.0%   | 93,026       | 41.3%   | 225,328 |
| fThymus              | d147 | 60,164      | 37.3%   | 40,987           | 25.4%   | 60,059       | 37.3%   | 161,210 |
| fThymus              | d105 | 48,894      | 34.2%   | 33,197           | 23.2%   | 60,748       | 42.5%   | 142,839 |
| fThymus              | d98  | 68,133      | 37.9%   | 45,099           | 25.1%   | 66,619       | 37.0%   | 179,851 |
| fThymus              | d127 | 73,567      | 38.2%   | 49,173           | 25.5%   | 69,990       | 36.3%   | 192,730 |
| fThymus              | d104 | 57,055      | 36.7%   | 37,830           | 24.3%   | 60,581       | 39.0%   | 155,466 |

| Cell- or tissue-type | Age* | Not aligned |         | Not DHS in mouse |         | DHS in mouse |         | Total#  |
|----------------------|------|-------------|---------|------------------|---------|--------------|---------|---------|
|                      |      | # peaks     | % peaks | # peaks          | % peaks | # peaks      | % peaks |         |
| fThymus              | d108 | 48,765      | 35.6%   | 31,881           | 23.3%   | 56,443       | 41.2%   | 137,089 |
| fThymus              | d113 | 51,506      | 35.3%   | 34,246           | 23.5%   | 60,161       | 41.2%   | 145,913 |
| GM04503D             |      | 89,876      | 37.4%   | 70,603           | 29.4%   | 79,709       | 33.2%   | 240,188 |
| GM04504A             |      | 84,495      | 37.1%   | 65,604           | 28.8%   | 77,926       | 34.2%   | 228,025 |
| GM06990              |      | 43,530      | 38.0%   | 27,508           | 24.0%   | 43,604       | 38.0%   | 114,642 |
| GM12864              |      | 67,850      | 41.4%   | 40,417           | 24.6%   | 55,753       | 34.0%   | 164,020 |
| GM12865              |      | 69,664      | 41.0%   | 42,297           | 24.9%   | 57,913       | 34.1%   | 169,874 |
| GM12878              |      | 55,743      | 39.3%   | 34,566           | 24.3%   | 51,686       | 36.4%   | 141,995 |
| H7_hESC_T14          |      | 59,597      | 34.5%   | 44,000           | 25.4%   | 69,296       | 40.1%   | 172,893 |
| H7_hESC_T2           |      | 60,813      | 30.8%   | 52,290           | 26.5%   | 84,526       | 42.8%   | 197,629 |
| H7_hESC_T5           |      | 101,067     | 40.4%   | 70,850           | 28.3%   | 78,116       | 31.2%   | 250,033 |
| HAc                  |      | 77,240      | 35.4%   | 61,257           | 28.0%   | 79,958       | 36.6%   | 218,455 |
| HAepiC               |      | 97,121      | 39.8%   | 69,829           | 28.6%   | 76,895       | 31.5%   | 243,845 |
| HAh                  |      | 86,423      | 35.2%   | 70,941           | 28.9%   | 88,082       | 35.9%   | 245,446 |
| HAsp                 |      | 88,285      | 37.4%   | 75,303           | 31.9%   | 72,765       | 30.8%   | 236,353 |
| HBMEC                |      | 92,189      | 38.3%   | 69,819           | 29.0%   | 78,658       | 32.7%   | 240,666 |
| HBVP                 |      | 96,603      | 38.5%   | 74,378           | 29.6%   | 80,001       | 31.9%   | 250,982 |
| HBVSMC               |      | 67,366      | 34.3%   | 54,369           | 27.7%   | 74,805       | 38.1%   | 196,540 |
| HCFaa                |      | 86,530      | 39.2%   | 64,883           | 29.4%   | 69,583       | 31.5%   | 220,996 |
| HCF                  |      | 76,528      | 35.7%   | 57,601           | 26.9%   | 80,296       | 37.4%   | 214,425 |
| HCM                  |      | 87,385      | 37.2%   | 64,247           | 27.4%   | 83,160       | 35.4%   | 234,792 |
| HConF                |      | 64,326      | 34.1%   | 49,361           | 26.2%   | 74,723       | 39.7%   | 188,410 |
| HCPepiC              |      | 97,182      | 38.4%   | 72,293           | 28.5%   | 83,826       | 33.1%   | 253,301 |
| HCT116               |      | 53,125      | 38.8%   | 31,591           | 23.1%   | 52,187       | 38.1%   | 136,903 |
| HEEpiC               |      | 101,853     | 41.6%   | 68,683           | 28.1%   | 74,232       | 30.3%   | 244,768 |
| Hela                 |      | 59,123      | 39.5%   | 39,411           | 26.3%   | 51,264       | 34.2%   | 149,798 |
| HEPG2                |      | 39,242      | 35.0%   | 26,199           | 23.4%   | 46,656       | 41.6%   | 112,097 |
| HESC                 |      | 71,678      | 39.3%   | 45,463           | 24.9%   | 65,350       | 35.8%   | 182,491 |
| hESCT0               |      | 136,414     | 44.1%   | 85,660           | 27.7%   | 86,969       | 28.1%   | 309,043 |
| HFF                  |      | 85,055      | 36.4%   | 65,221           | 27.9%   | 83,648       | 35.8%   | 233,924 |
| HFF_MyC              |      | 98,289      | 38.6%   | 70,575           | 27.7%   | 85,532       | 33.6%   | 254,396 |
| HGF                  |      | 62,573      | 35.1%   | 48,782           | 27.4%   | 66,760       | 37.5%   | 178,115 |
| HIPEpiC              |      | 107,400     | 39.9%   | 78,797           | 29.3%   | 82,905       | 30.8%   | 269,102 |
| HL60                 |      | 81,343      | 43.2%   | 47,679           | 25.3%   | 59,430       | 31.5%   | 188,452 |
| HMEC                 |      | 63,060      | 37.1%   | 46,803           | 27.5%   | 60,317       | 35.4%   | 170,180 |
| HMF                  |      | 80,142      | 37.3%   | 59,590           | 27.7%   | 75,340       | 35.0%   | 215,072 |
| HMVEC_dAd            |      | 51,193      | 33.7%   | 37,593           | 24.7%   | 63,319       | 41.6%   | 152,105 |
| HMVEC_dBIAd          |      | 71,178      | 36.5%   | 51,785           | 26.6%   | 71,870       | 36.9%   | 194,833 |
| HMVEC_dBINeo         |      | 74,224      | 36.6%   | 54,039           | 26.6%   | 74,553       | 36.8%   | 202,816 |
| HMVEC_dLyAd          |      | 53,129      | 34.4%   | 39,295           | 25.5%   | 61,810       | 40.1%   | 154,234 |
| HMVEC_dLyNeo         |      | 65,563      | 35.4%   | 48,152           | 26.0%   | 71,372       | 38.6%   | 185,087 |
| HMVEC_dNeo           |      | 59,515      | 34.7%   | 43,238           | 25.2%   | 68,778       | 40.1%   | 171,531 |
| HMVEC_LBI            |      | 75,549      | 37.0%   | 55,622           | 27.2%   | 73,266       | 35.8%   | 204,437 |
| HMVEC_LLly           |      | 61,126      | 35.1%   | 44,974           | 25.8%   | 67,968       | 39.0%   | 174,068 |
| HNPCEpiC             |      | 98,777      | 38.8%   | 74,578           | 29.3%   | 80,926       | 31.8%   | 254,281 |
| HPAEC                |      | 52,042      | 34.6%   | 38,140           | 25.4%   | 60,126       | 40.0%   | 150,308 |
| HPAF                 |      | 84,471      | 37.1%   | 61,520           | 27.1%   | 81,433       | 35.8%   | 227,424 |
| HPdLF                |      | 74,324      | 35.8%   | 59,192           | 28.5%   | 73,981       | 35.7%   | 207,497 |
| HPF                  |      | 65,833      | 34.7%   | 50,672           | 26.7%   | 73,258       | 38.6%   | 189,763 |
| HRCE                 |      | 88,432      | 38.3%   | 65,038           | 28.1%   | 77,596       | 33.6%   | 231,066 |
| HRE                  |      | 85,205      | 37.6%   | 63,436           | 28.0%   | 78,219       | 34.5%   | 226,860 |
| HRGEC                |      | 63,575      | 37.0%   | 47,061           | 27.4%   | 61,400       | 35.7%   | 172,036 |
| HRPEpiC              |      | 100,268     | 37.4%   | 80,359           | 30.0%   | 87,440       | 32.6%   | 268,067 |
| HSMM_D               |      | 101,244     | 37.5%   | 80,135           | 29.7%   | 88,246       | 32.7%   | 269,625 |
| HSMM                 |      | 104,311     | 38.4%   | 83,219           | 30.7%   | 83,901       | 30.9%   | 271,431 |
| hTH17                |      | 35,035      | 37.7%   | 22,567           | 24.3%   | 35,419       | 38.1%   | 93,021  |
| hTH1                 |      | 35,919      | 36.6%   | 22,049           | 22.5%   | 40,238       | 41.0%   | 98,206  |
| hTH2                 |      | 59,737      | 40.0%   | 36,764           | 24.6%   | 52,780       | 35.4%   | 149,281 |
| hTR                  |      | 57,337      | 38.3%   | 34,943           | 23.3%   | 57,424       | 38.4%   | 149,704 |
| HUVEC                |      | 50,074      | 33.7%   | 39,793           | 26.8%   | 58,633       | 39.5%   | 148,500 |
| HVMF                 |      | 78,271      | 37.4%   | 58,697           | 28.1%   | 72,042       | 34.5%   | 209,010 |
| Jurkat               |      | 80,694      | 43.8%   | 47,148           | 25.6%   | 56,320       | 30.6%   | 184,162 |
| K562                 |      | 75,406      | 44.5%   | 41,067           | 24.3%   | 52,826       | 31.2%   | 169,299 |
| LHCN_M2_D4           |      | 96,994      | 38.0%   | 72,396           | 28.3%   | 86,072       | 33.7%   | 255,462 |
| LHCN_M2              |      | 87,242      | 38.2%   | 64,367           | 28.2%   | 76,491       | 33.5%   | 228,100 |
| LNcap                |      | 86,111      | 41.2%   | 61,243           | 29.3%   | 61,736       | 29.5%   | 209,090 |
| M059J                |      | 104,568     | 40.4%   | 73,394           | 28.3%   | 81,008       | 31.3%   | 258,970 |
| MCF7                 |      | 103,258     | 42.7%   | 65,227           | 27.0%   | 73,364       | 30.3%   | 241,849 |
| MCF7                 |      | 62,412      | 41.2%   | 40,681           | 26.8%   | 48,493       | 32.0%   | 151,586 |
| MCF7_ER              |      | 110,407     | 43.3%   | 69,194           | 27.2%   | 75,090       | 29.5%   | 254,691 |
| NB4                  |      | 70,437      | 41.2%   | 41,264           | 24.1%   | 59,308       | 34.7%   | 171,009 |
| NHA                  |      | 85,719      | 36.9%   | 68,675           | 29.5%   | 78,051       | 33.6%   | 232,445 |
| NHBE_RA              |      | 68,025      | 37.4%   | 46,201           | 25.4%   | 67,562       | 37.2%   | 181,788 |



| Cell- or tissue-type | Age* | Not aligned |         | Not DHS in mouse |         | DHS in mouse |         | Total#  |
|----------------------|------|-------------|---------|------------------|---------|--------------|---------|---------|
|                      |      | # peaks     | % peaks | # peaks          | % peaks | # peaks      | % peaks |         |
| NHDF_Ad              |      | 102,754     | 37.7%   | 80,642           | 29.6%   | 88,807       | 32.6%   | 272,203 |
| NHDF_Neo             |      | 80,333      | 35.4%   | 66,749           | 29.4%   | 80,125       | 35.3%   | 227,207 |
| NHEK                 |      | 67,911      | 39.1%   | 47,560           | 27.4%   | 58,321       | 33.6%   | 173,792 |
| NHLF                 |      | 92,846      | 37.4%   | 74,196           | 29.9%   | 81,323       | 32.7%   | 248,365 |
| NT2_D1               |      | 88,796      | 41.0%   | 55,529           | 25.6%   | 72,255       | 33.4%   | 216,580 |
| PANC1                |      | 55,251      | 38.7%   | 36,159           | 25.3%   | 51,479       | 36.0%   | 142,889 |
| PrEC                 |      | 81,066      | 40.9%   | 55,146           | 27.9%   | 61,781       | 31.2%   | 197,993 |
| RPML_7951            |      | 74,892      | 37.3%   | 53,533           | 26.7%   | 72,143       | 36.0%   | 200,568 |
| RPTEC                |      | 79,909      | 39.2%   | 56,747           | 27.8%   | 67,167       | 33.0%   | 203,823 |
| SAEC                 |      | 96,014      | 41.2%   | 66,279           | 28.5%   | 70,540       | 30.3%   | 232,833 |
| SKMC                 |      | 91,154      | 36.8%   | 73,780           | 29.8%   | 82,738       | 33.4%   | 247,672 |
| SK_N_MC              |      | 63,753      | 37.0%   | 52,338           | 30.3%   | 56,359       | 32.7%   | 172,450 |
| SKNSH                |      | 31,456      | 28.0%   | 28,969           | 25.8%   | 52,062       | 46.3%   | 112,487 |
| T_47D                |      | 71,740      | 40.0%   | 45,070           | 25.1%   | 62,636       | 34.9%   | 179,446 |
| WERI_Rb1             |      | 88,488      | 40.7%   | 63,636           | 29.3%   | 65,350       | 30.0%   | 217,474 |
| WI_38                |      | 75,170      | 37.4%   | 56,069           | 27.9%   | 69,727       | 34.7%   | 200,966 |
| WI_38_TAM            |      | 97,277      | 39.9%   | 71,270           | 29.2%   | 75,185       | 30.8%   | 243,732 |

\* y = years post-natal, d = days post-conception, blank = primary, cultured or malignant cells  
# Total peaks from master peaks list (see Supporting Methods)
